# Supplementary material for: Characterising covalent warhead reactivity
Source: PubMed Central journal article supplement (PMC6538824; doi:10.1016/j.bmc.2019.04.002), 2019-05-15

# 4-phenylazetididin-2-one (4)

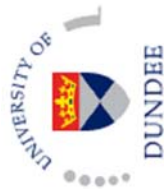

Current Data Parameters  
NAME 1  
EXPNO 1  
PROCNO 1

F2 - Acquisition Parameters  
Date\_ 20170503  
Time 15.38  
INSTRUM spect  
PROBHD 5 mm QNP 1H/13  
PULPROG zg30  
TD 65536  
SOLVENT CDCl3  
NS 16  
DS 2  
SWH 10000.000 Hz  
FIDRES 0.152588 Hz  
AQ 3.2767999 sec  
RG 114  
DW 50.000 usec  
DE 6.50 usec  
TE 298.2 K  
D1 1.0000000 sec  
TD0 1

==== CHANNEL f1 =====  
SFO1 500.1330885 MHz  
NUC1 1H  
P1 10.00 usec  
PLW1 25.0000000 W

F2 - Processing parameters  
SI 65536  
SF 500.1300127 MHz  
WDW EM  
SSB 0  
LB 0.30 Hz  
GB 0  
PC 1.00

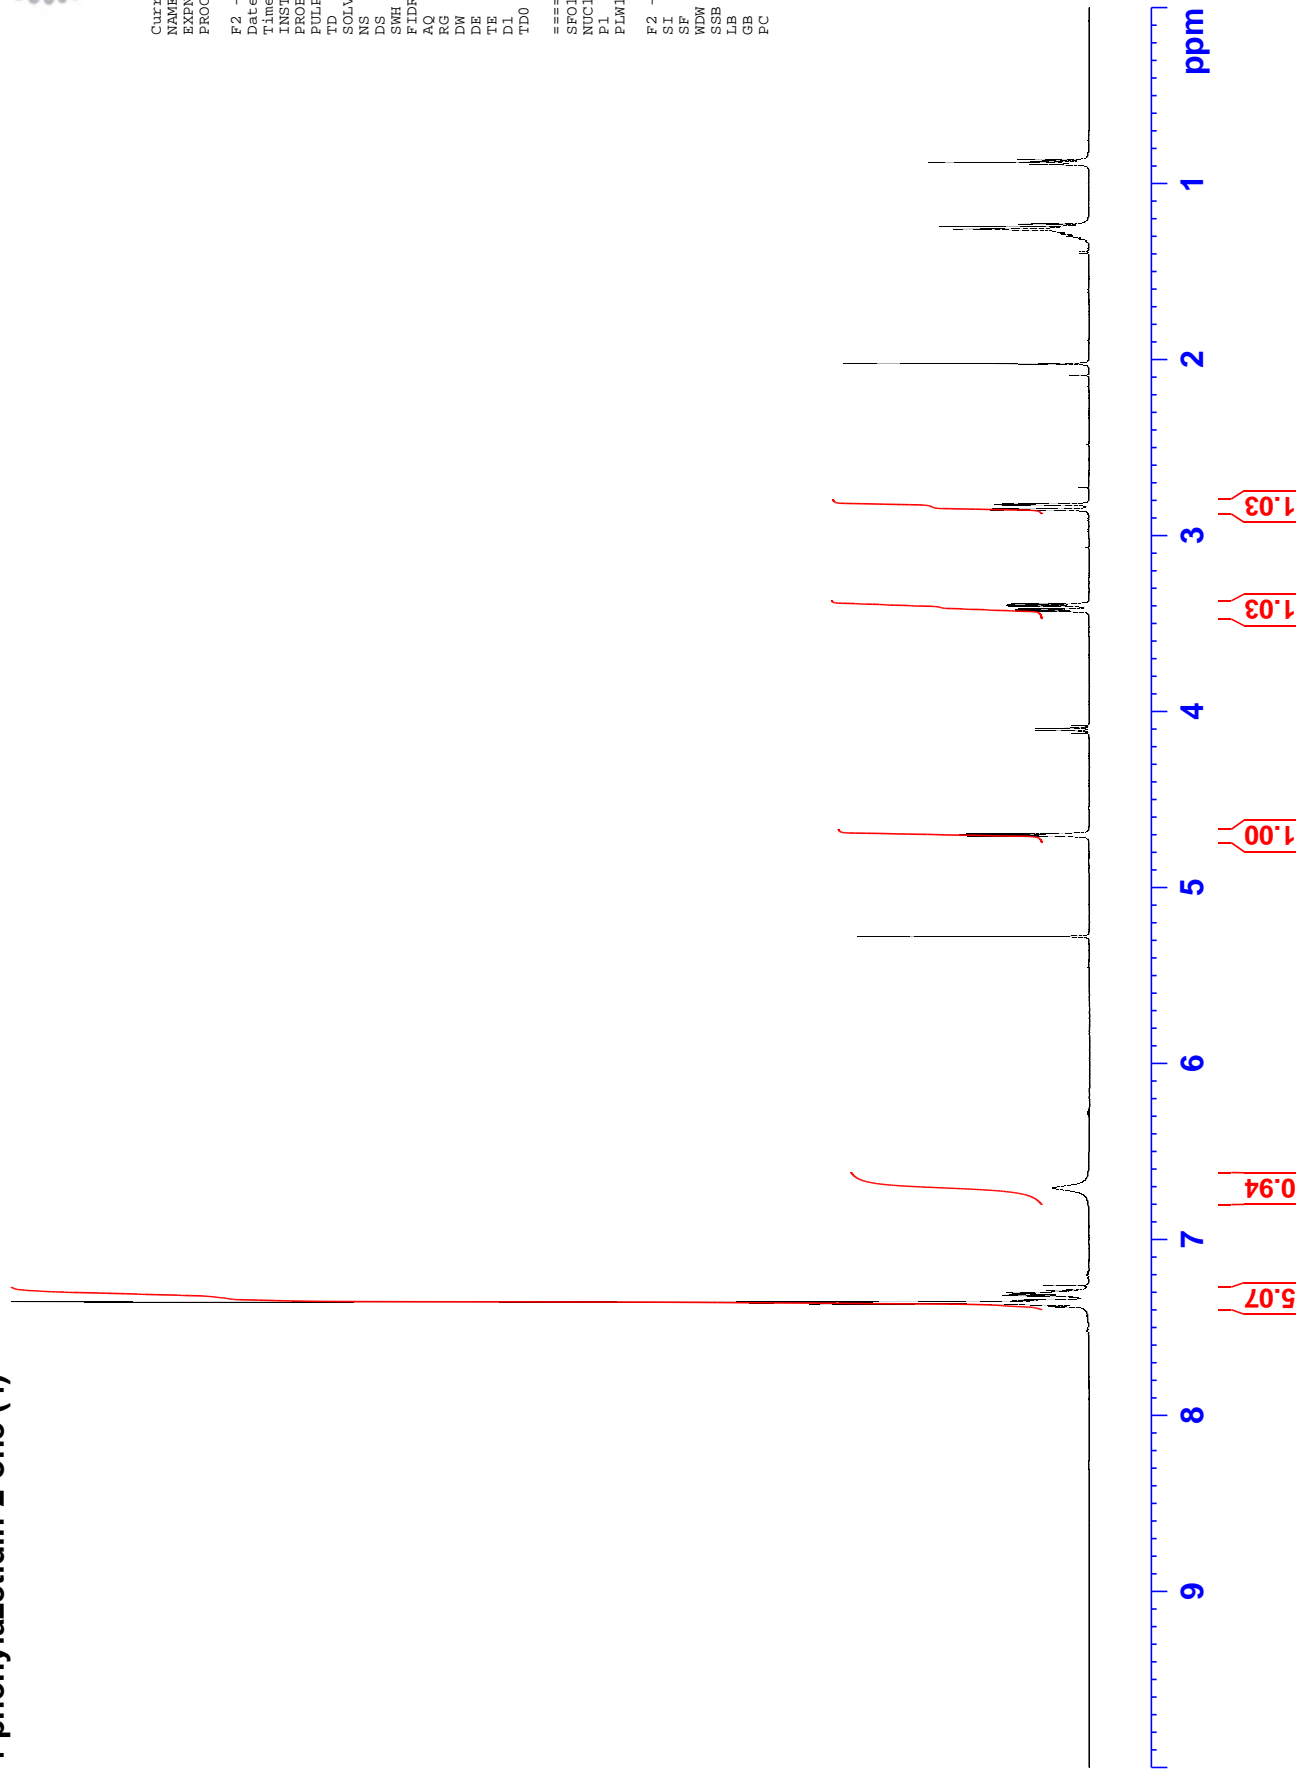

# 4-phenylazetididin-2-one (4)

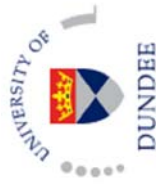

168.46  
140.33  
128.87  
128.21  
125.69  
77.41  
77.16  
76.90  
50.42  
47.94

Current Data Parameters  
NAME  
EXNO 2  
PROCNO 1

F2 - Acquisition Parameters  
Date\_ 20170503  
Time 16.00  
INSTRUM spect  
PROBHD 5 mm QNP 1H/13  
PULPROG zgpg30  
TD 65536  
SOLVENT CDCl3  
NS 256  
DS 4  
SWH 29761.904 Hz  
FIDRES 0.454131 Hz  
AQ 1.1010048 sec  
RG 2050  
DW 16.800 usec  
DE 6.50 usec  
TE 298.2 K  
D1 2.0000000 sec  
D11 0.0300000 sec  
TD0 1

==== CHANNEL f1 =====  
SFO1 125.7703637 MHz  
NUC1 13C  
P1 7.50 usec  
PLW1 92.0000000 W

==== CHANNEL f2 =====  
SFO2 500.1320005 MHz  
NUC2 1H  
CPDPRG[2] waltz16  
PCPD2 80.00 usec  
PLW2 25.0000000 W  
PLW12 0.39063001 W  
PLW13 0.19648001 W

F2 - Processing parameters  
SI 32768  
SF 125.7577833 MHz  
WDW EM  
SSB 0  
LB 1.00 Hz  
GB 0  
PC 1.40

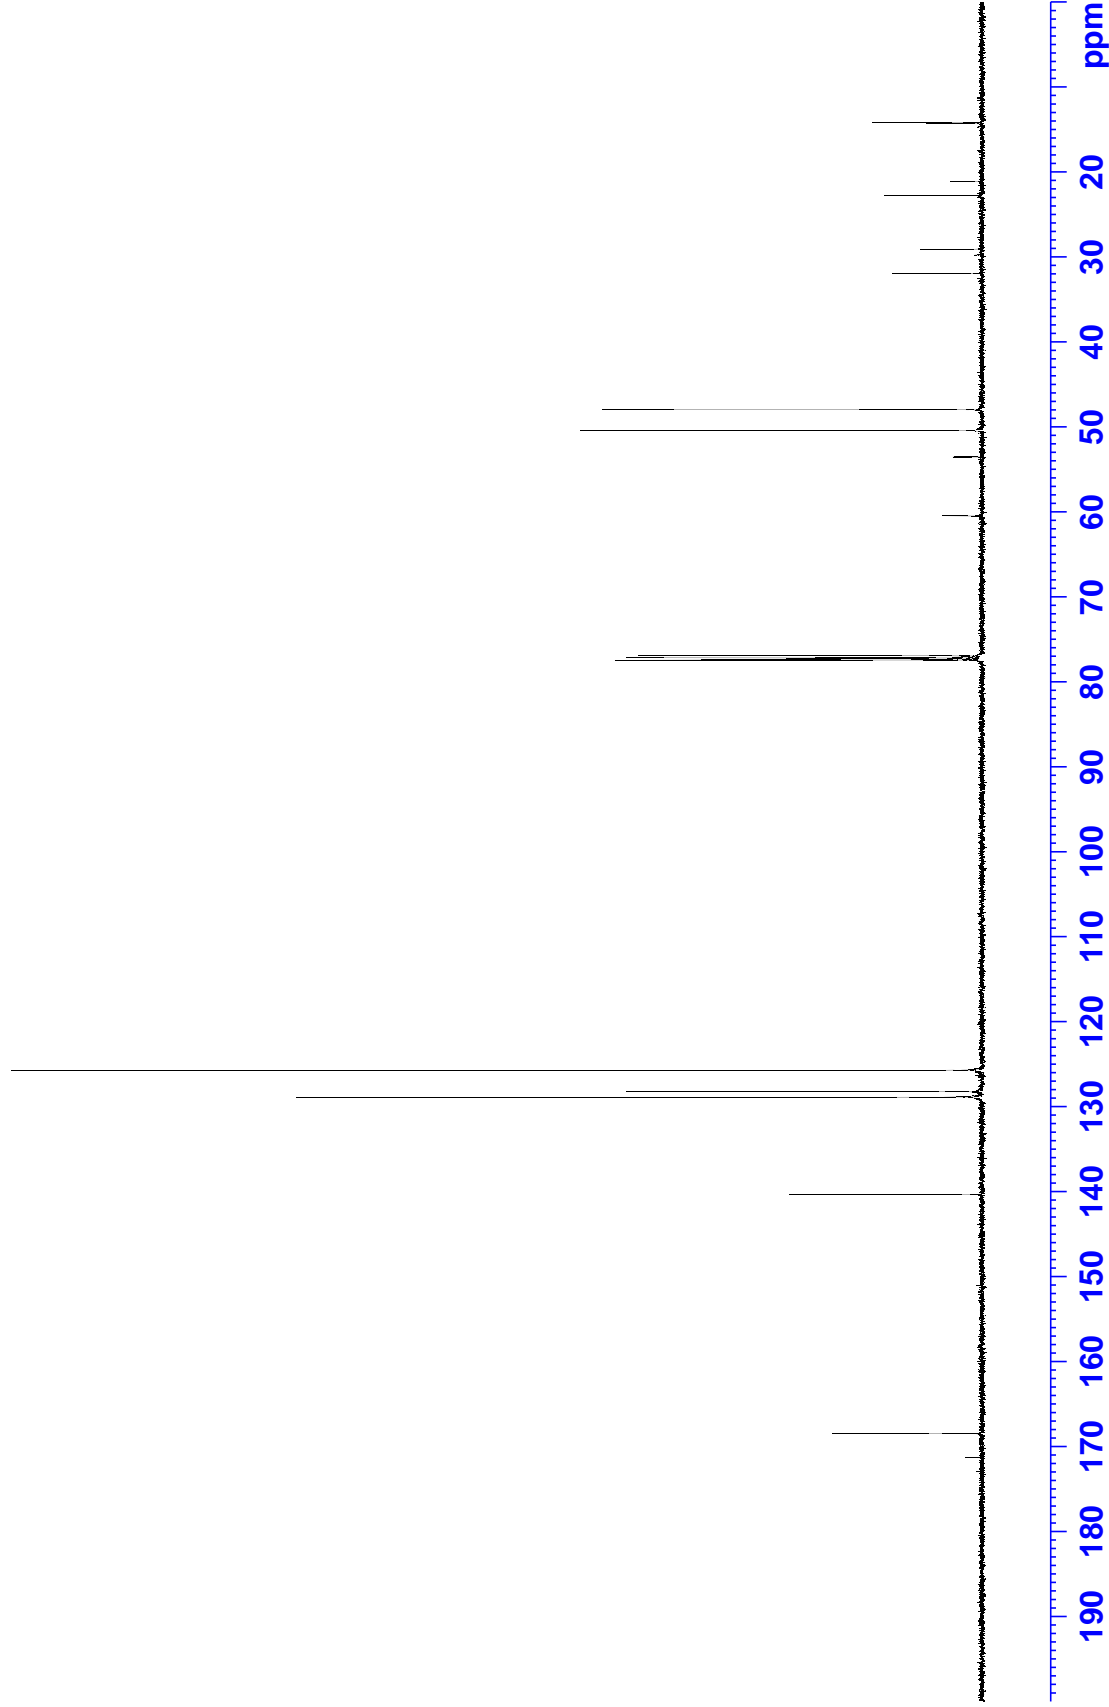

# 1-phenylazetididin-2-one (6)



Current Data Parameters  
NAMEI 1  
EXPNO 1  
PROCNO 1

F2 - Acquisition Parameters  
Date\_ 20170720  
Time 15.37  
INSTRUM spect  
PROBHD 5 mm QNP 1H/13  
PULPROG zg30  
TD 65536  
SOLVENT CDCl3  
NS 16  
DS 2  
SWH 10000.000 Hz  
FIDRES 0.152588 Hz  
AQ 3.2767999 sec  
RG 71.8  
DW 50.000 usec  
DE 6.50 usec  
TE 298.2 K  
D1 1.0000000 sec  
TD0 1

==== CHANNEL f1 =====  
SFO1 500.1330885 MHz  
NUC1 1H  
P1 10.00 usec  
PLW1 25.0000000 W

F2 - Processing parameters  
SI 65536  
SF 500.1300126 MHz  
WDW EM  
SSB 0  
LB 0.30 Hz  
GB 0  
PC 1.00

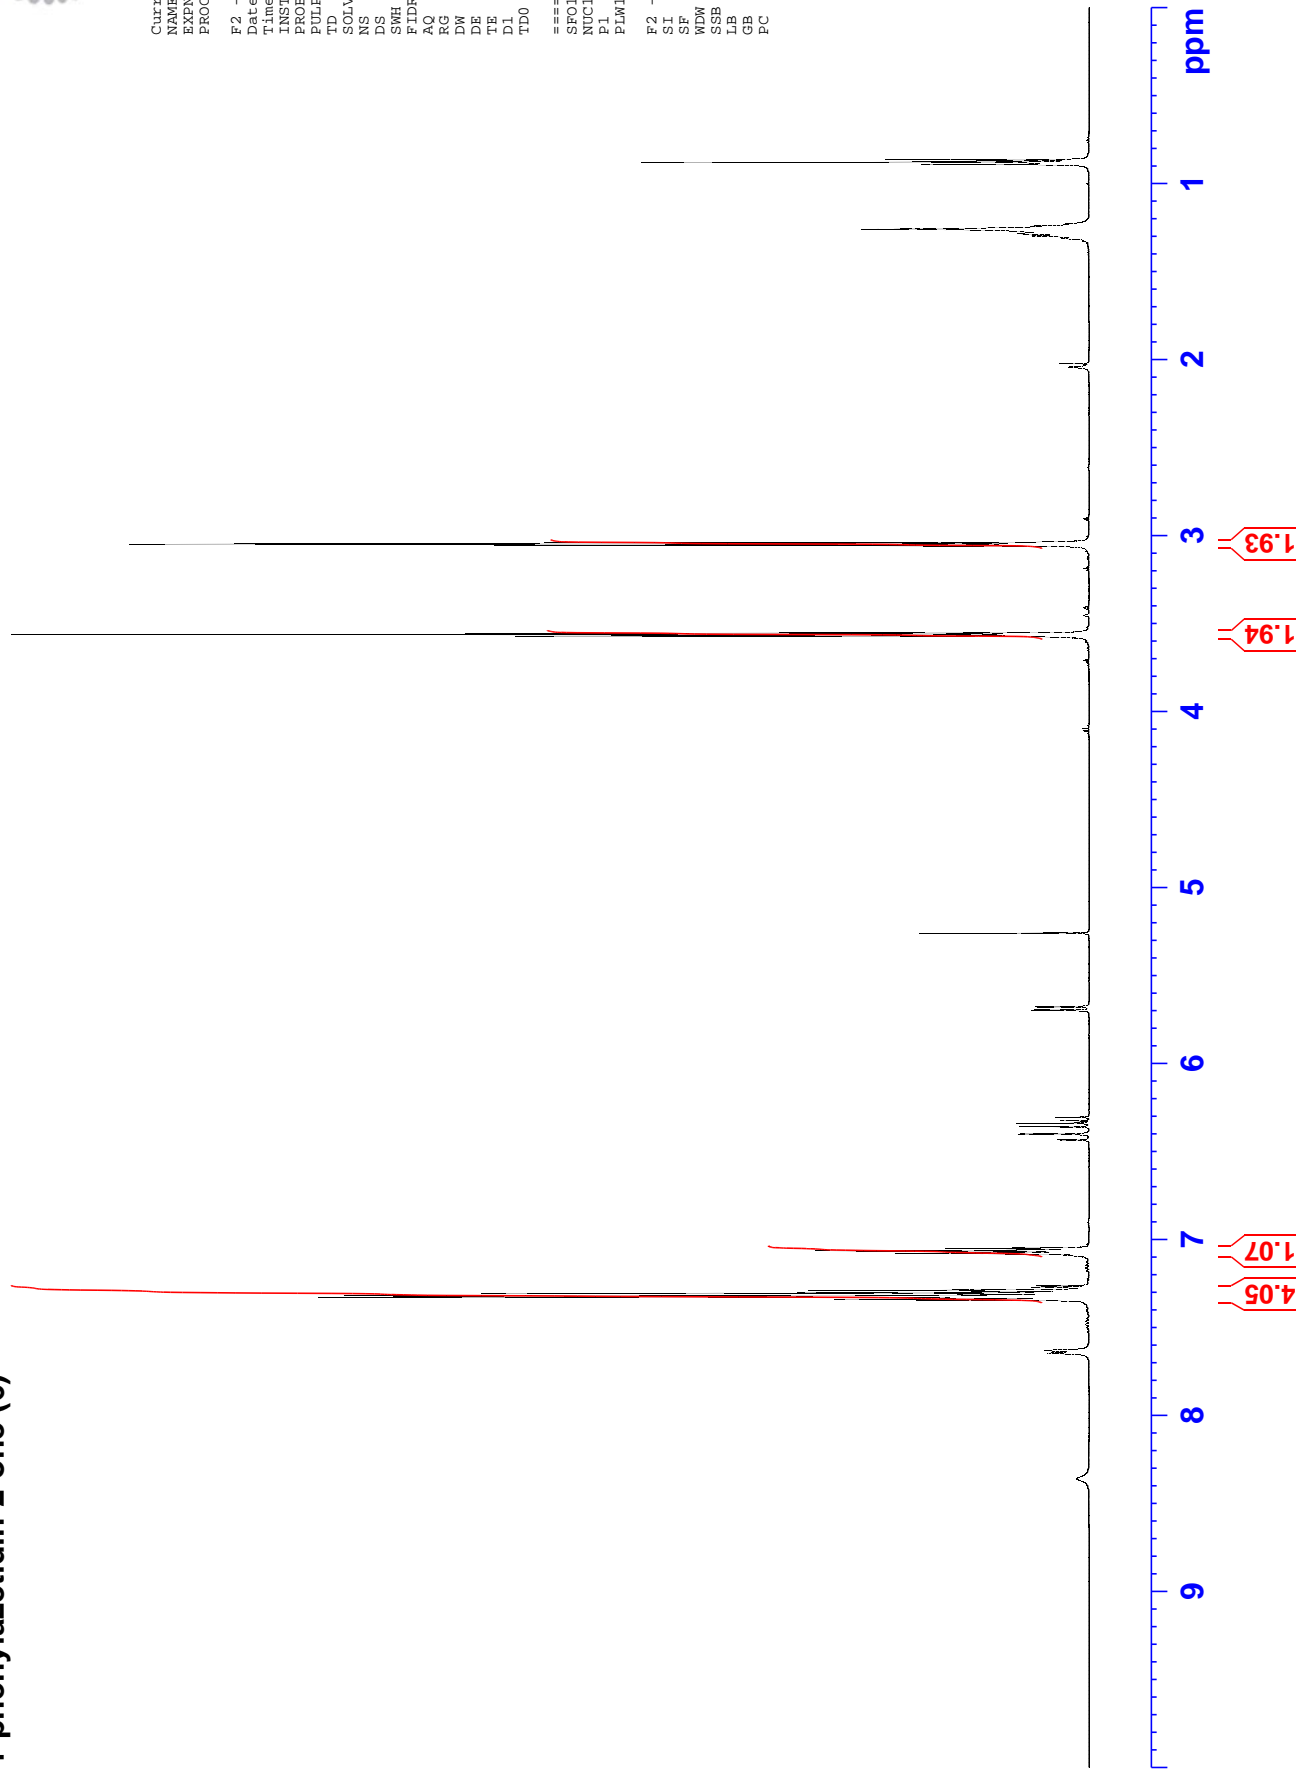

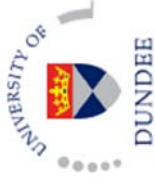

# 1-phenylazetididin-2-one (6)

164.54  
138.51  
129.12  
128.89  
123.81  
116.12  
77.41  
77.16  
76.90  
37.99  
36.02

Current Data Parameters  
NAME 3  
EXNO 1  
PROCNO 1

F2 - Acquisition Parameters  
Date\_ 20170720  
Time 16.05  
INSTRUM spect  
PROBHD 5 mm QNP 1H/13  
PULPROG zgpg30  
TD 65536  
SOLVENT CDCl3  
NS 256  
DS 4  
SWH 29761.904 Hz  
FIDRES 0.454131 Hz  
AQ 1.1010048 sec  
RG 2050  
RW 16.800 usec  
DE 6.50 usec  
TE 298.2 K  
D1 2.0000000 sec  
D11 0.0300000 sec  
TD0 1

==== CHANNEL f1 =====  
SFO1 125.7703637 MHz  
NUC1 13C  
P1 7.50 usec  
PLW1 92.0000000 W

==== CHANNEL f2 =====  
SFO2 500.1320005 MHz  
NUC2 1H  
CPDPRG[2] waltz16  
PCPD2 80.00 usec  
PLW2 25.0000000 W  
PLW12 0.39063001 W  
PLW13 0.19648001 W

F2 - Processing parameters  
SI 32768  
SF 125.7577904 MHz  
WDW EM  
SSB 0  
LB 1.00 Hz  
GB 0  
PC 1.40

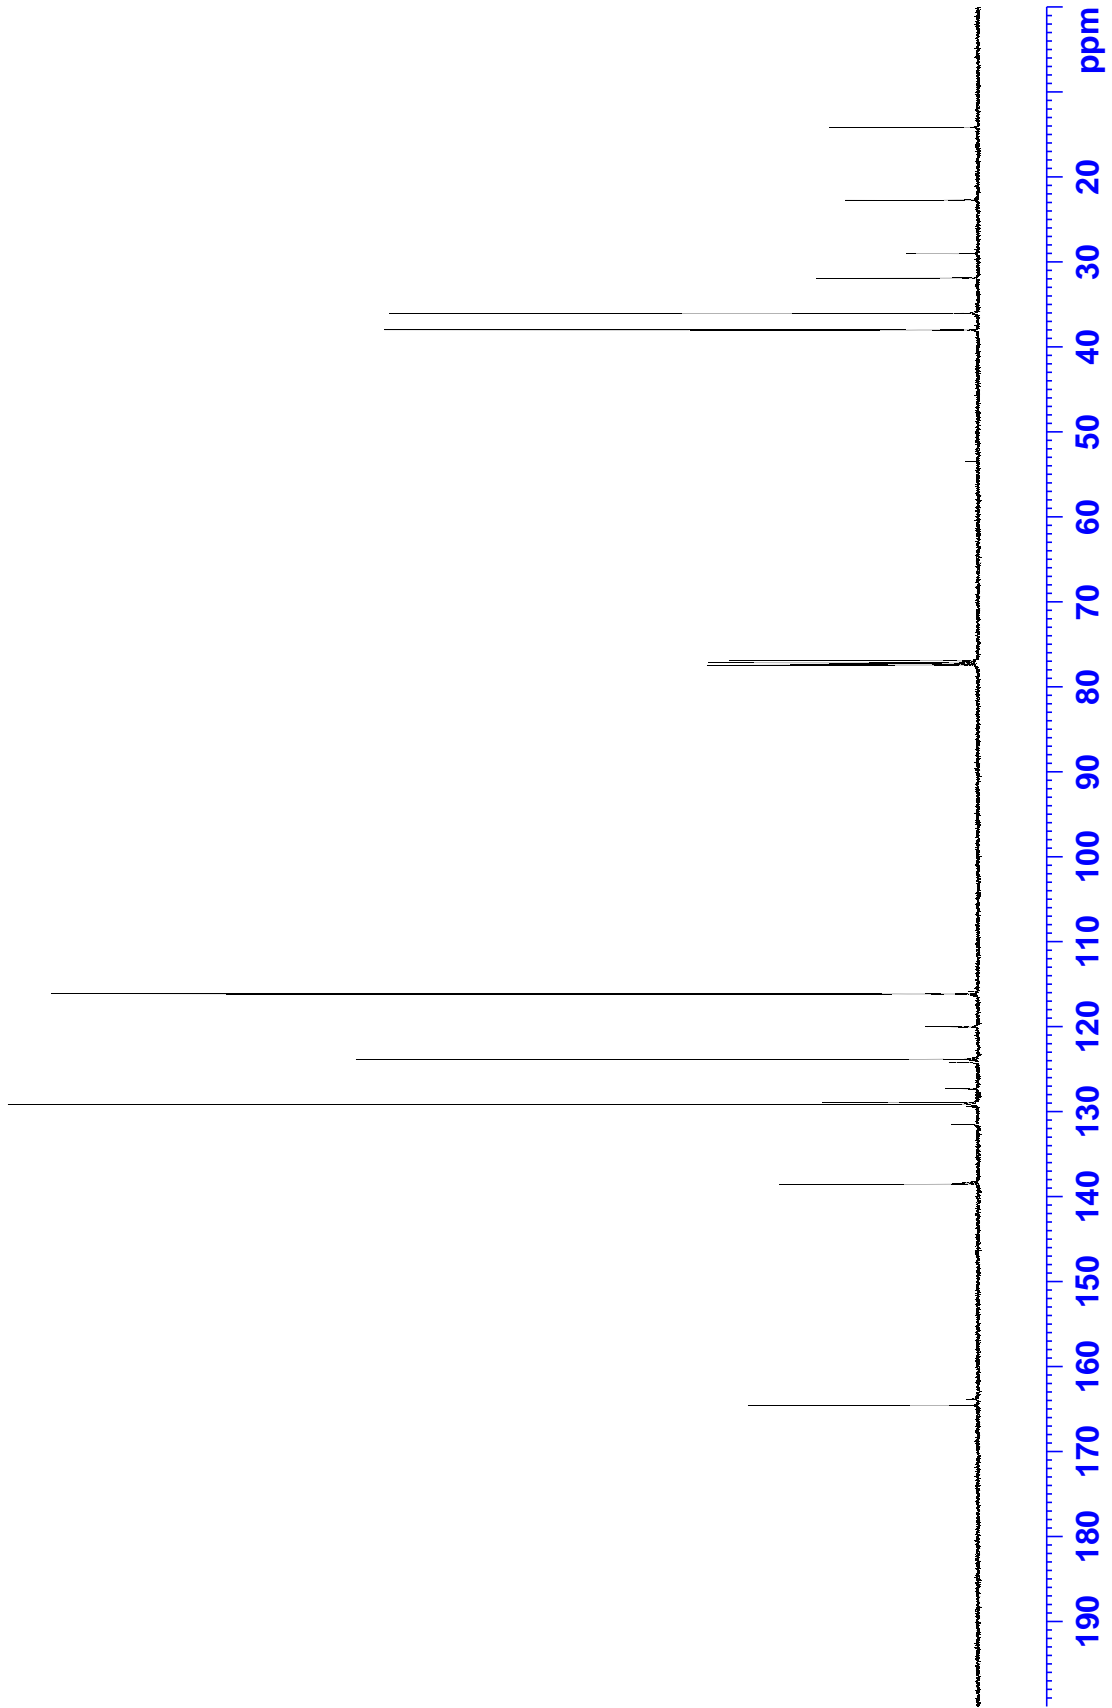

**(E)-4-(dimethylamino)-N-phenyl-but-2-enamide (10)**



Current Data Parameters  
NAME 1  
EXPNO 1  
PROCNO 1  
F2 - Acquisition Parameters  
Date\_ 20170420  
Time 11.56  
INSTRUM spect  
PROBHD 5 mm QNP 1H/13  
PULPROG zg30  
TD 65536  
SOLVENT CDCl3  
NS 16  
DS 2  
SWH 10000.000 Hz  
FIDRES 0.152588 Hz  
AQ 3.2767999 sec  
RG 101  
DW 50.000 usec  
DE 6.50 usec  
TE 294.5 K  
D1 1.0000000 sec  
TD0 1  
=====  
CHANNEL f1  
SFO1 500.1330885 MHz  
NUC1 1H  
P1 10.00 usec  
PLW1 25.0000000 W  
F2 - Processing parameters  
SI 65536  
SF 500.1299979 MHz  
WDW EM  
SSB 0  
LB 0.30 Hz  
GB 0  
PC 1.00

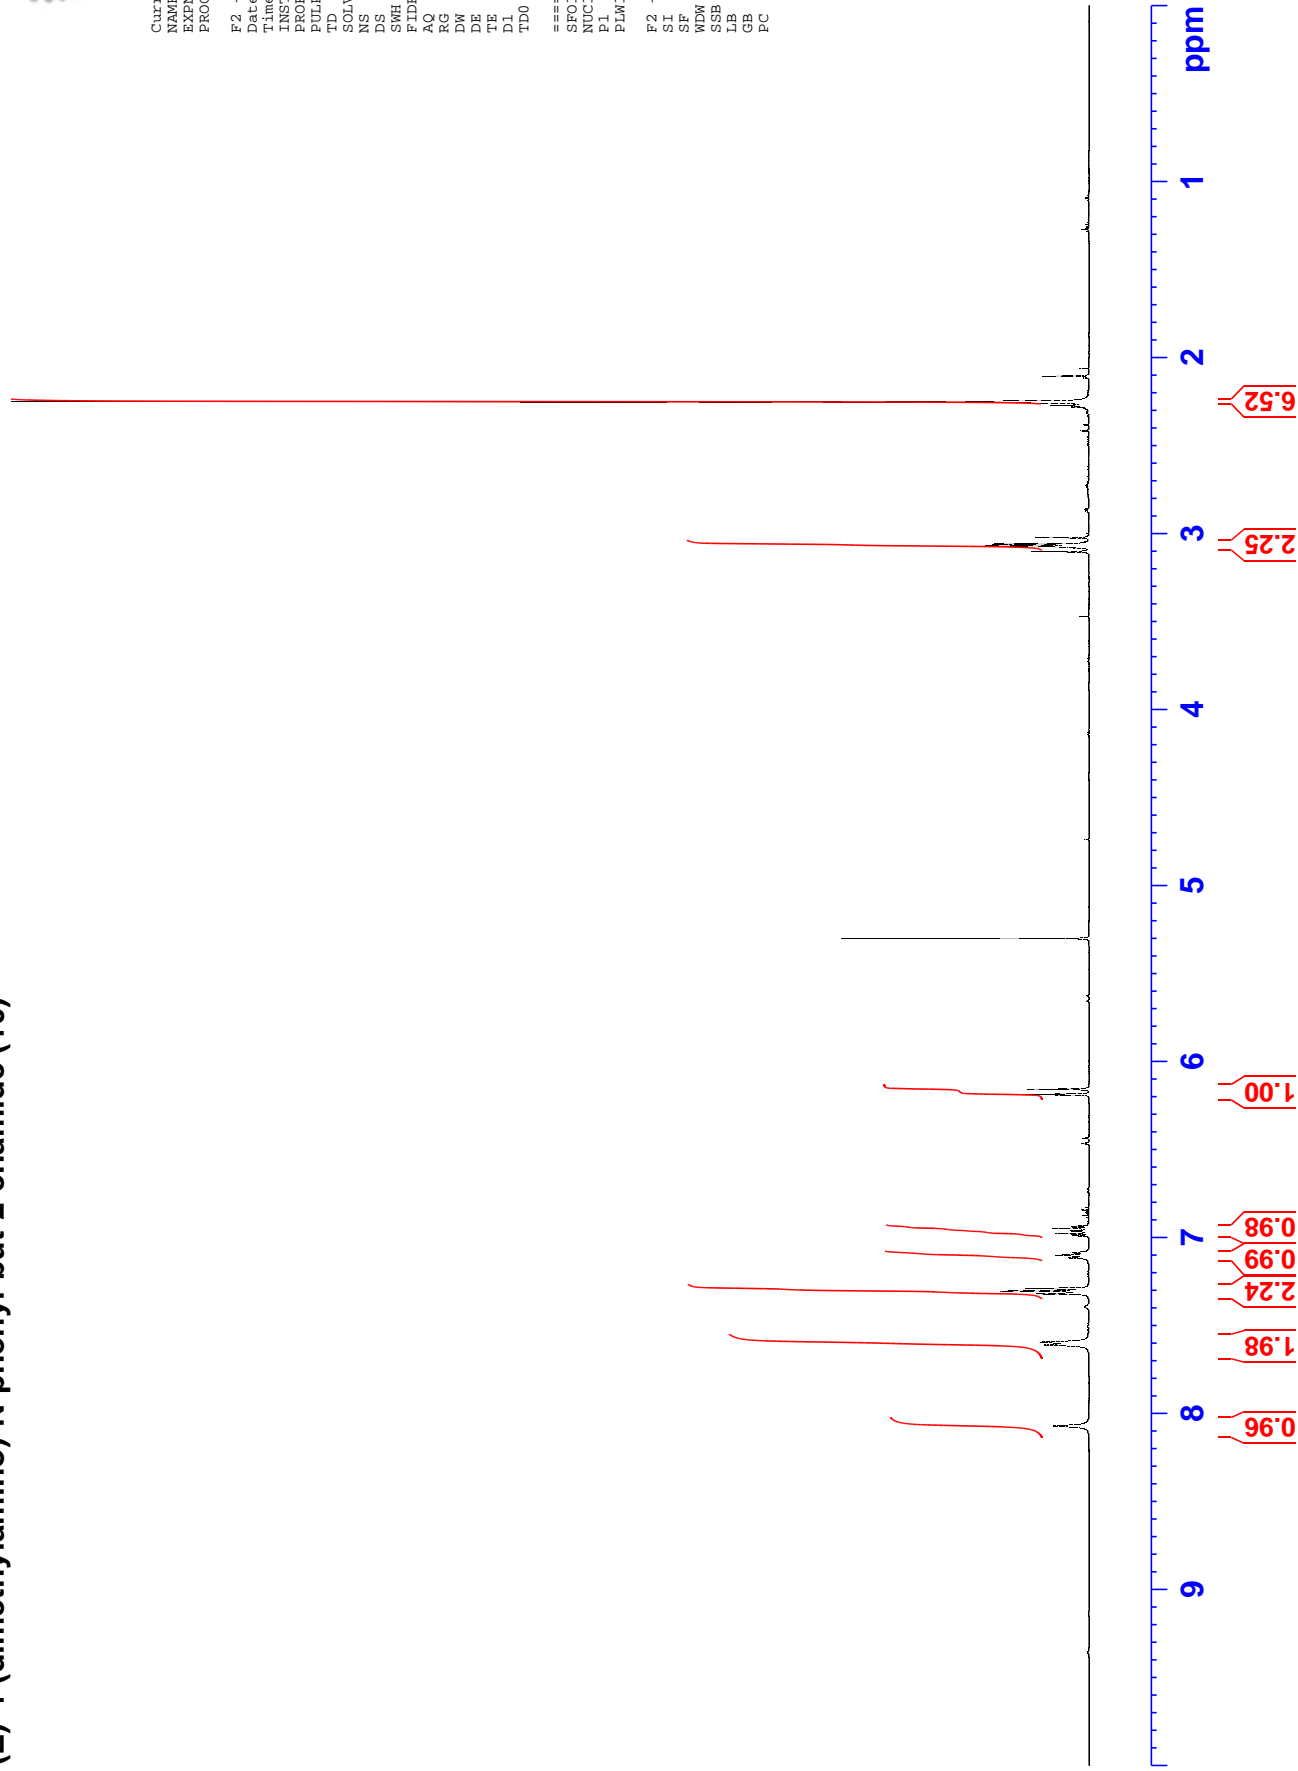



# (E)-4-(dimethylamino)-N-phenyl-but-2-enamide (10)

142.83  
129.20  
125.76  
124.56  
119.95

77.47  
77.16  
76.84

60.53

45.71

Current Data Parameters  
NAME1  
EXNO 23  
PROCNO 1  
  
F2 - Acquisition Parameters  
Date\_ 20181114  
Time 3.06  
INSTRUM spect  
PROBHD 5 mm PADUL13C  
PULPROG udeflt  
TD 17996  
SOLVENT CDCl3  
NS 2048  
DS 0  
SWH 25000.000 Hz  
FIDRES 1.389198 Hz  
AQ 0.3599200 sec  
RG 196.14  
DW 20.000 usec  
DE 8.66 usec  
TE 294.6 K  
D1 3.00000000 sec  
D11 0.03000000 sec  
D12 0.00020000 sec  
D20 200.00000000 sec  
TD0 1

==== CHANNEL f1 =====  
SFO1 100.6238346 MHz  
NUC1 13C  
P1 10.00 usec  
P3 2000.00 usec  
P26 500.00 usec  
PLW1 36.00000000 W  
SPNAM[5] Crp60comp.4  
SPOALS 0.500  
SPOFFS5 0 Hz  
SPW5 5.50040007 W  
SPNAM[8] Crp60.0.5.20.1  
SPOAL8  
SPOFFS8 0 Hz  
SPW8 5.50040007 W

==== CHANNEL f2 =====  
SFO2 400.1316005 MHz  
NUC2 1H  
CPDPRG[2] waltz64  
PCPD2 90.00 usec  
PLW2 20.00000000 W  
PLW12 0.24691001 W  
  
F2 - Processing parameters  
SI 262144  
SF 100.6127551 MHz  
WDW EM  
SSB 0  
LB 2.00 Hz  
GB 0  
PC 1.40

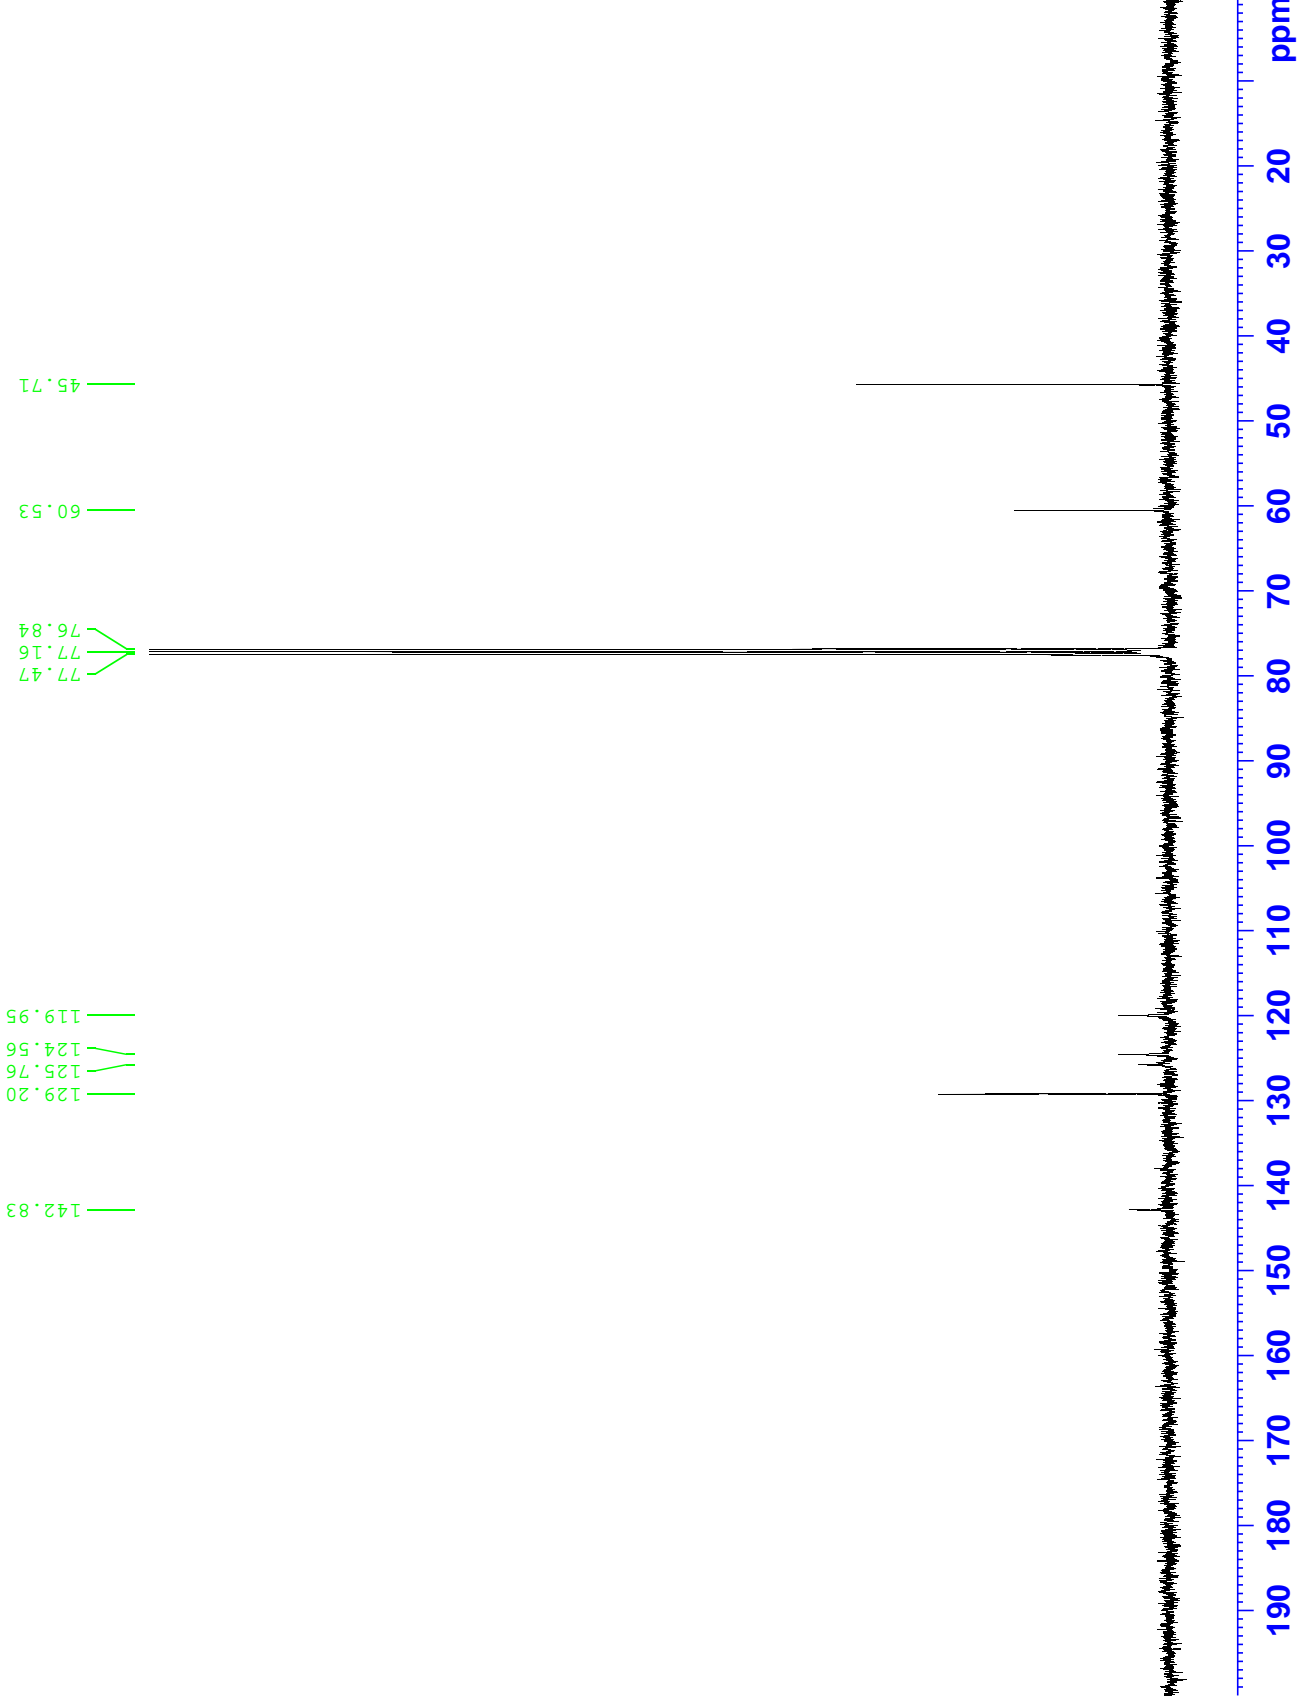

# 1-phenylprop-2-yn-1-ol (17)



Current Data Parameters  
NAME 1  
EXPNO 1  
PROCNO 1

F2 - Acquisition Parameters  
Date\_ 20170524  
Time 16.30  
INSTRUM spect  
PROBHD 5 mm PADUL 13C  
PULPROG zg30  
TD 131072  
SOLVENT CDCl3  
NS 16  
DS 4  
SWH 12019.230 Hz  
FIDRES 0.091699 Hz  
AQ 5.4525952 sec  
RG 14.07  
DW 41.600 usec  
DE 12.17 usec  
TE 298.2 K  
D1 0.1000000 sec  
TD0 1

==== CHANNEL f1 =====  
SFO1 400.1324710 MHz  
NUC1 1H  
P1 10.00 usec  
PLW1 20.0000000 W

F2 - Processing parameters  
SI 131072  
SF 400.1300093 MHz  
WDW EM  
SSB 0  
LB 0.10 Hz  
GB 0  
PC 1.00

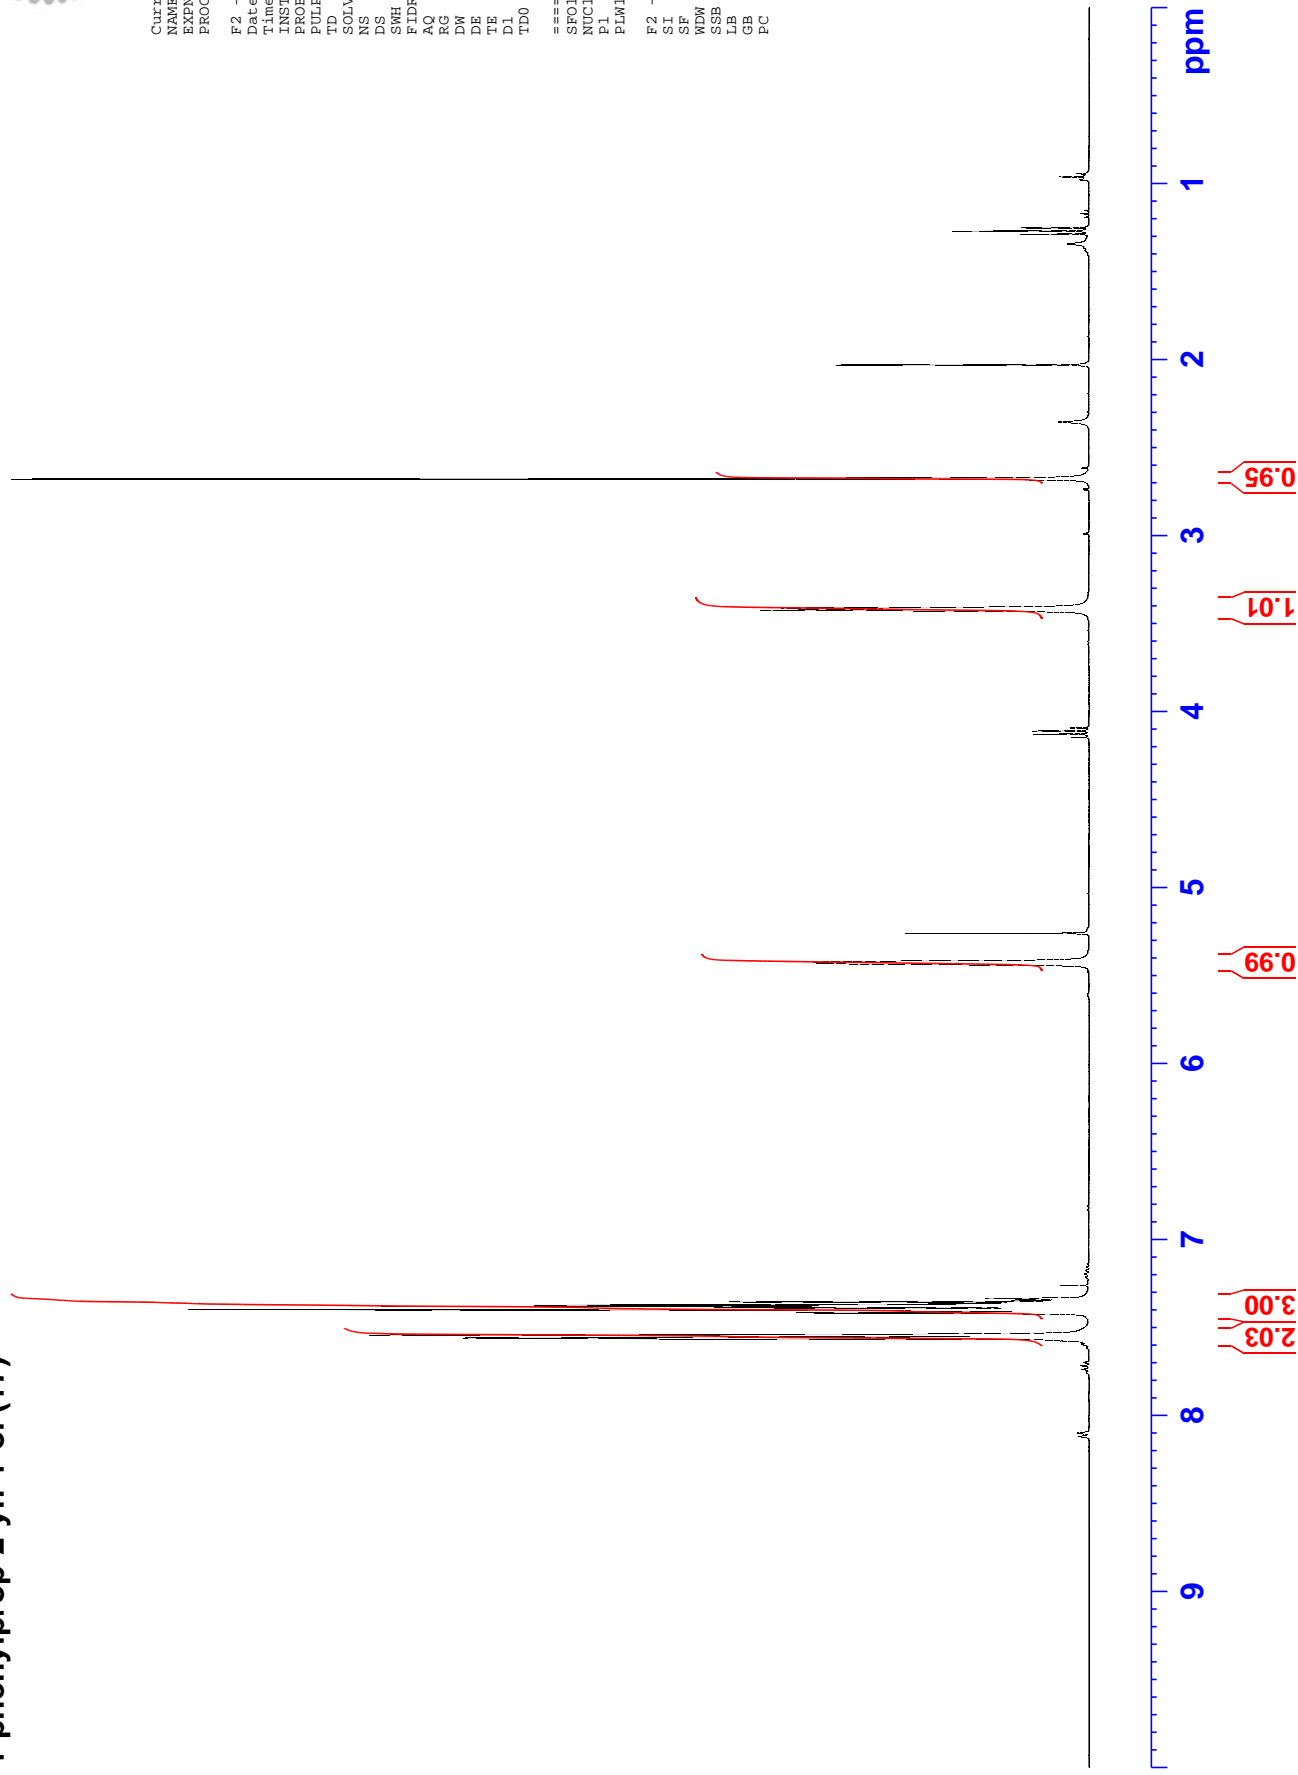

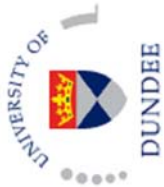

# 1-phenylprop-2-yn-1-one (11)

Current Data Parameters  
NAME 1  
EXPNO 1  
PROCNO 1

F2 - Acquisition Parameters  
Date\_ 20170530  
Time 13.11  
INSTRUM spect  
PROBHD 5 mm PADUL13C  
PULPROG zg30  
TD 131072  
SOLVENT CDCl3  
NS 16  
DS 4  
SWH 12019.230 Hz  
FIDRES 0.091699 Hz  
AQ 5.4525952 sec  
RG 39.17  
DW 41.600 usec  
DE 12.17 usec  
TE 298.2 K  
D1 0.1000000 sec  
TD0 1

==== CHANNEL f1 =====  
SFO1 400.1324710 MHz  
NUC1 1H  
P1 10.00 usec  
PLW1 20.0000000 W

F2 - Processing parameters  
SI 131072  
SF 400.1300092 MHz  
WDW EM  
SSB 0  
LB 0.10 Hz  
GB 0  
PC 1.00

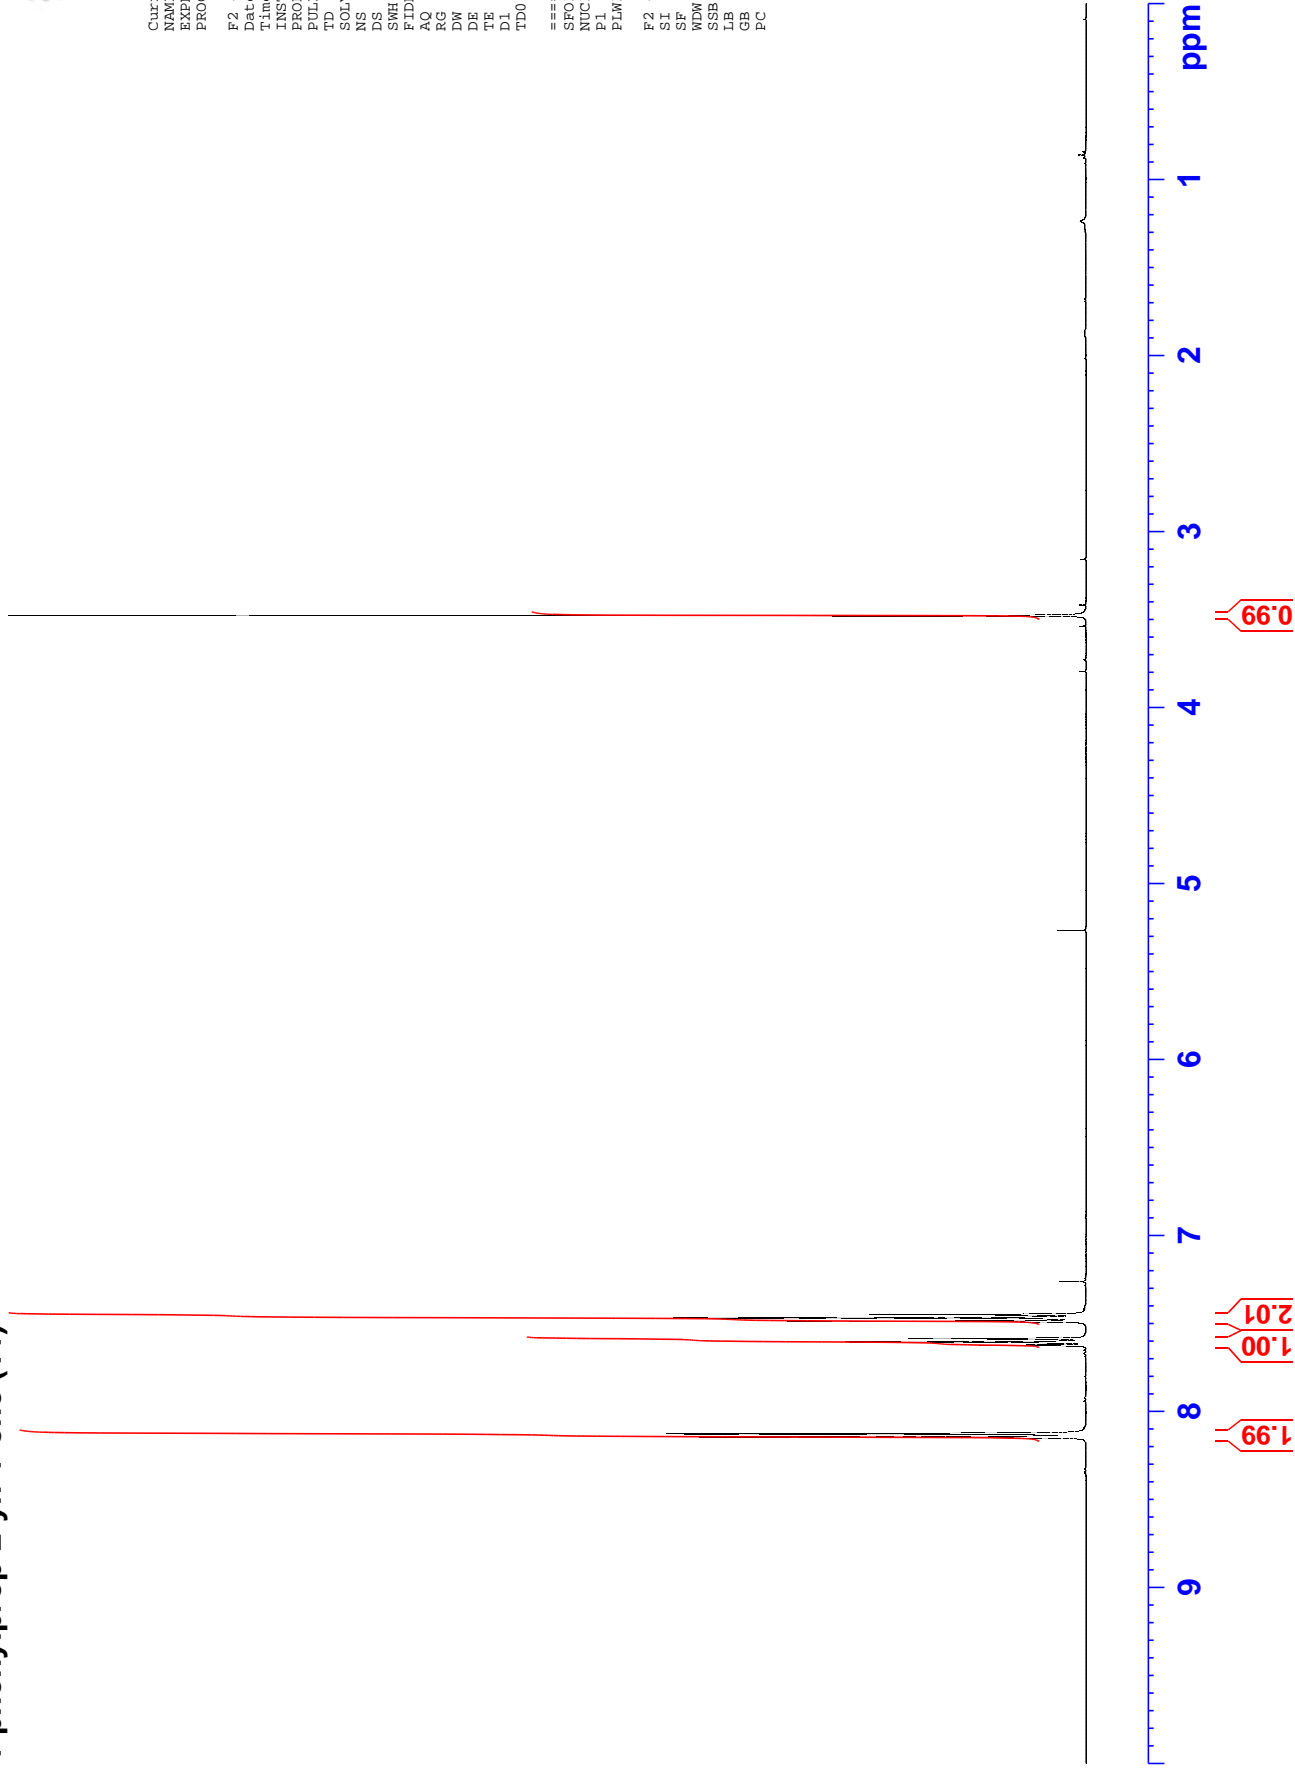



1-phenylprop-2-yn-1-one (11)

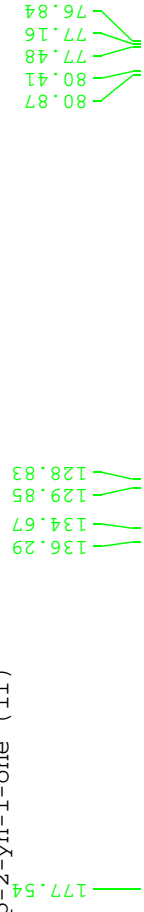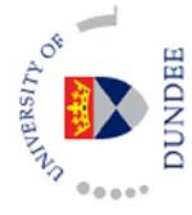

Current Data Parameters  
NAME EXPNO 21  
PROCNO 1

F2 - Acquisition Parameters  
Date\_ 20181114  
Time 0.44  
INSTRUM spect  
PROBHD 5 mm PADUL13C  
PULPROG udeflt  
TD 17996  
SOLVENT CDCl3  
NS 2048  
DS 0  
SWH 25000.000 Hz  
FIDRES 1.389198 Hz  
AQ 0.3599200 sec  
RG 196.14  
DW 20.000 usec  
DE 8.66 usec  
TE 294.6 K  
D1 3.00000000 sec  
D11 0.03000000 sec  
D12 0.00002000 sec  
D20 200.00000000 sec  
TD0 1

==== CHANNEL f1 =====  
SFO1 100.6238346 MHz  
NUC1 13C  
P1 10.00 usec  
P13 2000.00 usec  
P26 500.00 usec  
PLW1 36.00000000 W  
SPNAM[5] Crp60comp.4  
SFOAL5 0.500  
SFOFF5 0 Hz  
SEP5 5.50040007 W  
SPNAM[8] Crp60.0.5,20.1  
SFOAL8 0.500  
SFOFF8 0 Hz  
SPW8 5.50040007 W

==== CHANNEL f2 =====  
SFO2 400.1316005 MHz  
NUC2 1H  
CFDPRG[2] waltz64  
PCPD2 90.00 usec  
PLW2 20.00000000 W  
PLW12 0.24691001 W

F2 - Processing parameters  
SI 262144  
SF 100.6127560 MHz  
WDW EM  
SSB 0  
LB 2.00 Hz  
GB 0  
PC 1.40

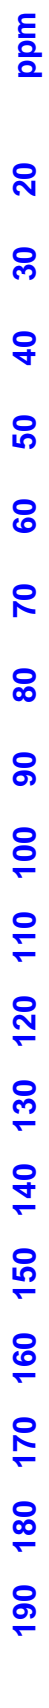

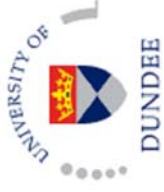

# N-phenylprop-2-enamide (12)

Current Data Parameters  
NAME 30  
EXPNO 1  
PROCNO 1

F2 - Acquisition Parameters  
Date\_ 20181112  
Time 12.32  
INSTRUM spect  
PROBHD 5 mm PADUL 13C  
PULPROG zg30  
TD 65536  
SOLVENT DMSO  
NS 16  
DS 2  
SWH 8000.000 Hz  
FIDRES 0.122070 Hz  
AQ 4.0960002 sec  
RG 196.14  
DW 62.500 usec  
DE 11.07 usec  
TE 303.1 K  
D1 1.0000000 sec  
TD0 1

==== CHANNEL f1 =====  
SFO1 400.1324710 MHz  
NUC1 1H  
P1 10.00 usec  
PLW1 20.0000000 W

F2 - Processing parameters  
SI 65536  
SF 400.1300028 MHz  
WDW EM  
SSB 0  
LB 0.30 Hz  
GB 0  
PC 1.00

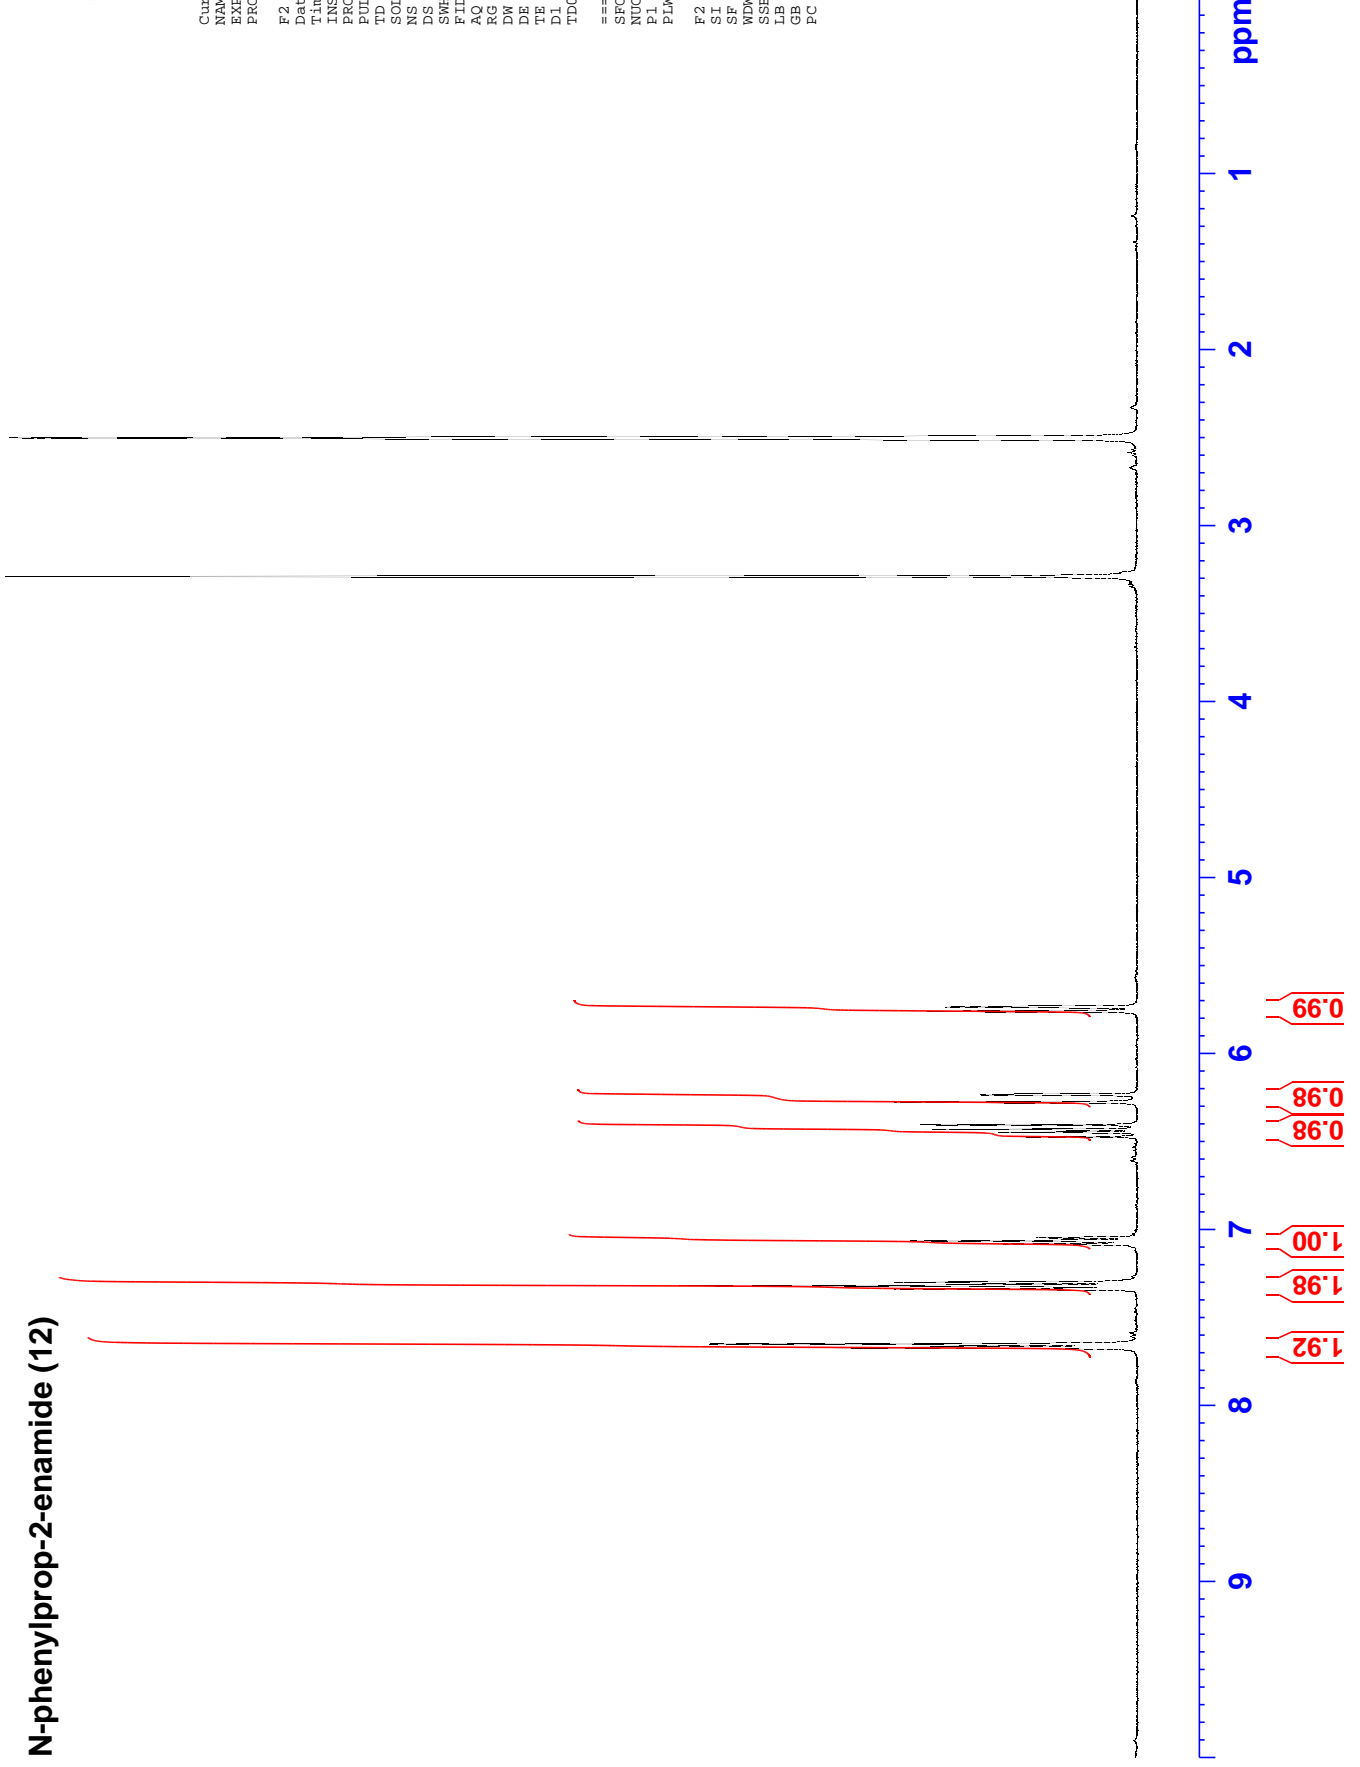

N-phenylprop-2-enamide (12)

163.0  
138.95  
131.86  
128.68  
126.69  
123.40  
119.30

40.15  
39.94  
39.73  
39.52  
39.31  
39.10  
38.89

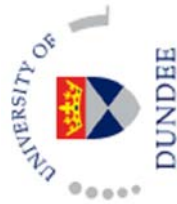

Current Data Parameters  
NAME  
EXPNO 32  
PROCNO 1

F2 - Acquisition Parameters  
Date\_ 20181112  
Time 20.12  
INSTRUM spect  
PROBHD 5 mm PADUL13C  
PULPROG udeflt  
TD 17996  
SOLVENT DMSO  
NS 256  
DS 0  
SWH 25000.000 Hz  
FIDRES 1.389198 Hz  
AQ 0.3599200 sec  
RG 196.14  
DW 20.000 usec  
DE 8.66 usec  
TE 303.1 K  
D1 3.00000000 sec  
D11 0.03000000 sec  
D12 0.00002000 sec  
D20 200.00000000 sec  
TD0 1

==== CHANNEL f1 =====  
SFO1 100.6238346 MHz  
NUC1 13C  
P1 10.00 usec  
P13 2000.00 usec  
P26 500.00 usec  
PLW1 36.00000000 W  
SPNAM[5] Crp60comp.4  
SFOALS 0.500  
SFOFFS5 0 Hz  
SFM5 5.50040007 W  
SPNAM[8] Crp60.0.5,20.1  
SFOALS8 0.500  
SFOFFS8 0 Hz  
SFM8 5.50040007 W

==== CHANNEL f2 =====  
SFO2 400.1316005 MHz  
NUC2 1H  
CFDPRG[2] waltz64  
PCPD2 90.00 usec  
PLW2 20.00000000 W  
PLW12 0.24691001 W

F2 - Processing parameters  
SI 262144  
SF 100.6128228 MHz  
WDW EM  
SSB 0  
LB 2.00 Hz  
GB 0  
PC 1.40

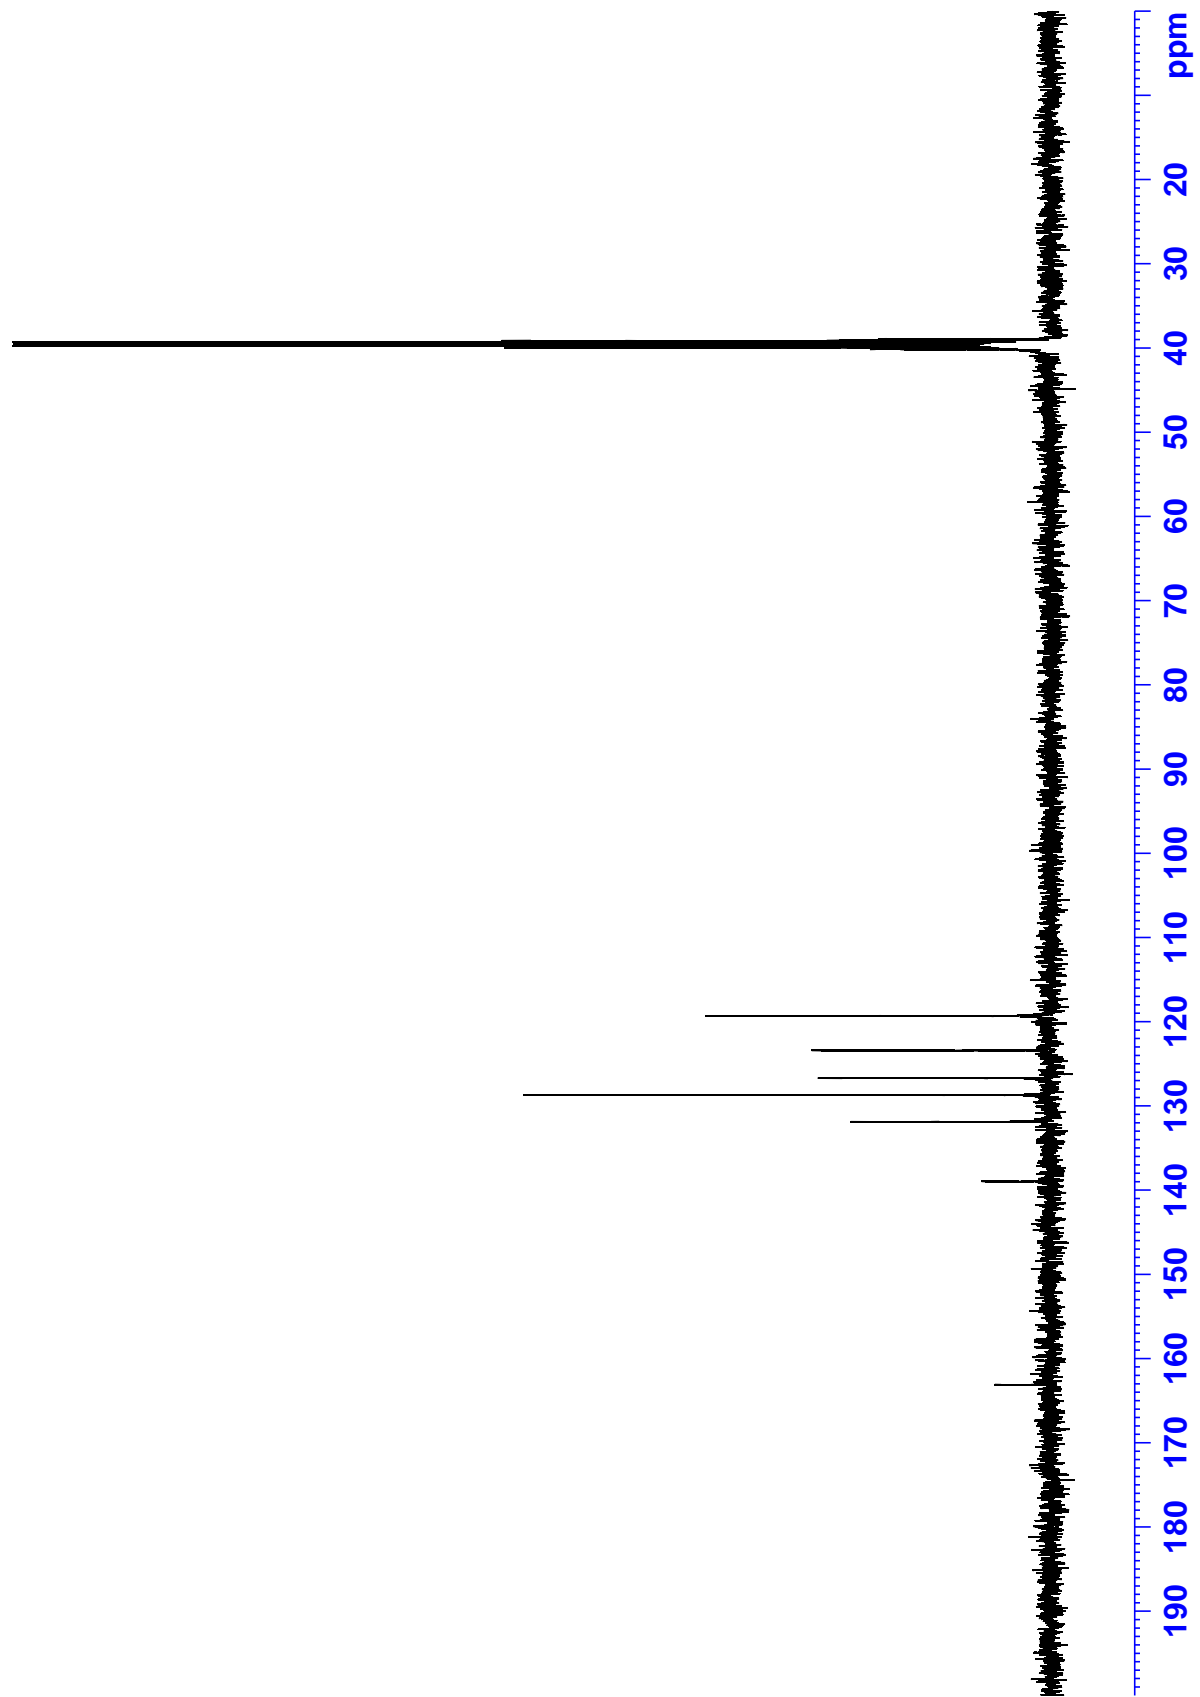



benzenesulfonyl fluoride (13)

Current Data Parameters  
NAME 1  
EXPNO 1  
PROCNO 1  
F2 - Acquisition Parameters  
Date\_ 20170518  
Time 16.19  
INSTRUM spect  
PROBHD 5 mm QNP 1H/13  
PULPROG zg30  
TD 65536  
SOLVENT CDCl3  
NS 16  
DS 2  
SWH 10000.000 Hz  
FIDRES 0.152588 Hz  
AQ 3.2767999 sec  
RG 161  
DW 50.000 usec  
DE 6.50 usec  
TE 298.2 K  
D1 1.0000000 sec  
TD0 1  
==== CHANNEL f1 =====  
SFO1 500.1330885 MHz  
NUC1 1H  
P1 10.00 usec  
PLW1 25.0000000 W  
F2 - Processing parameters  
SI 65536  
SF 500.1300129 MHz  
WDW EM  
SSB 0  
LB 0.30 Hz  
GB 0  
PC 1.00

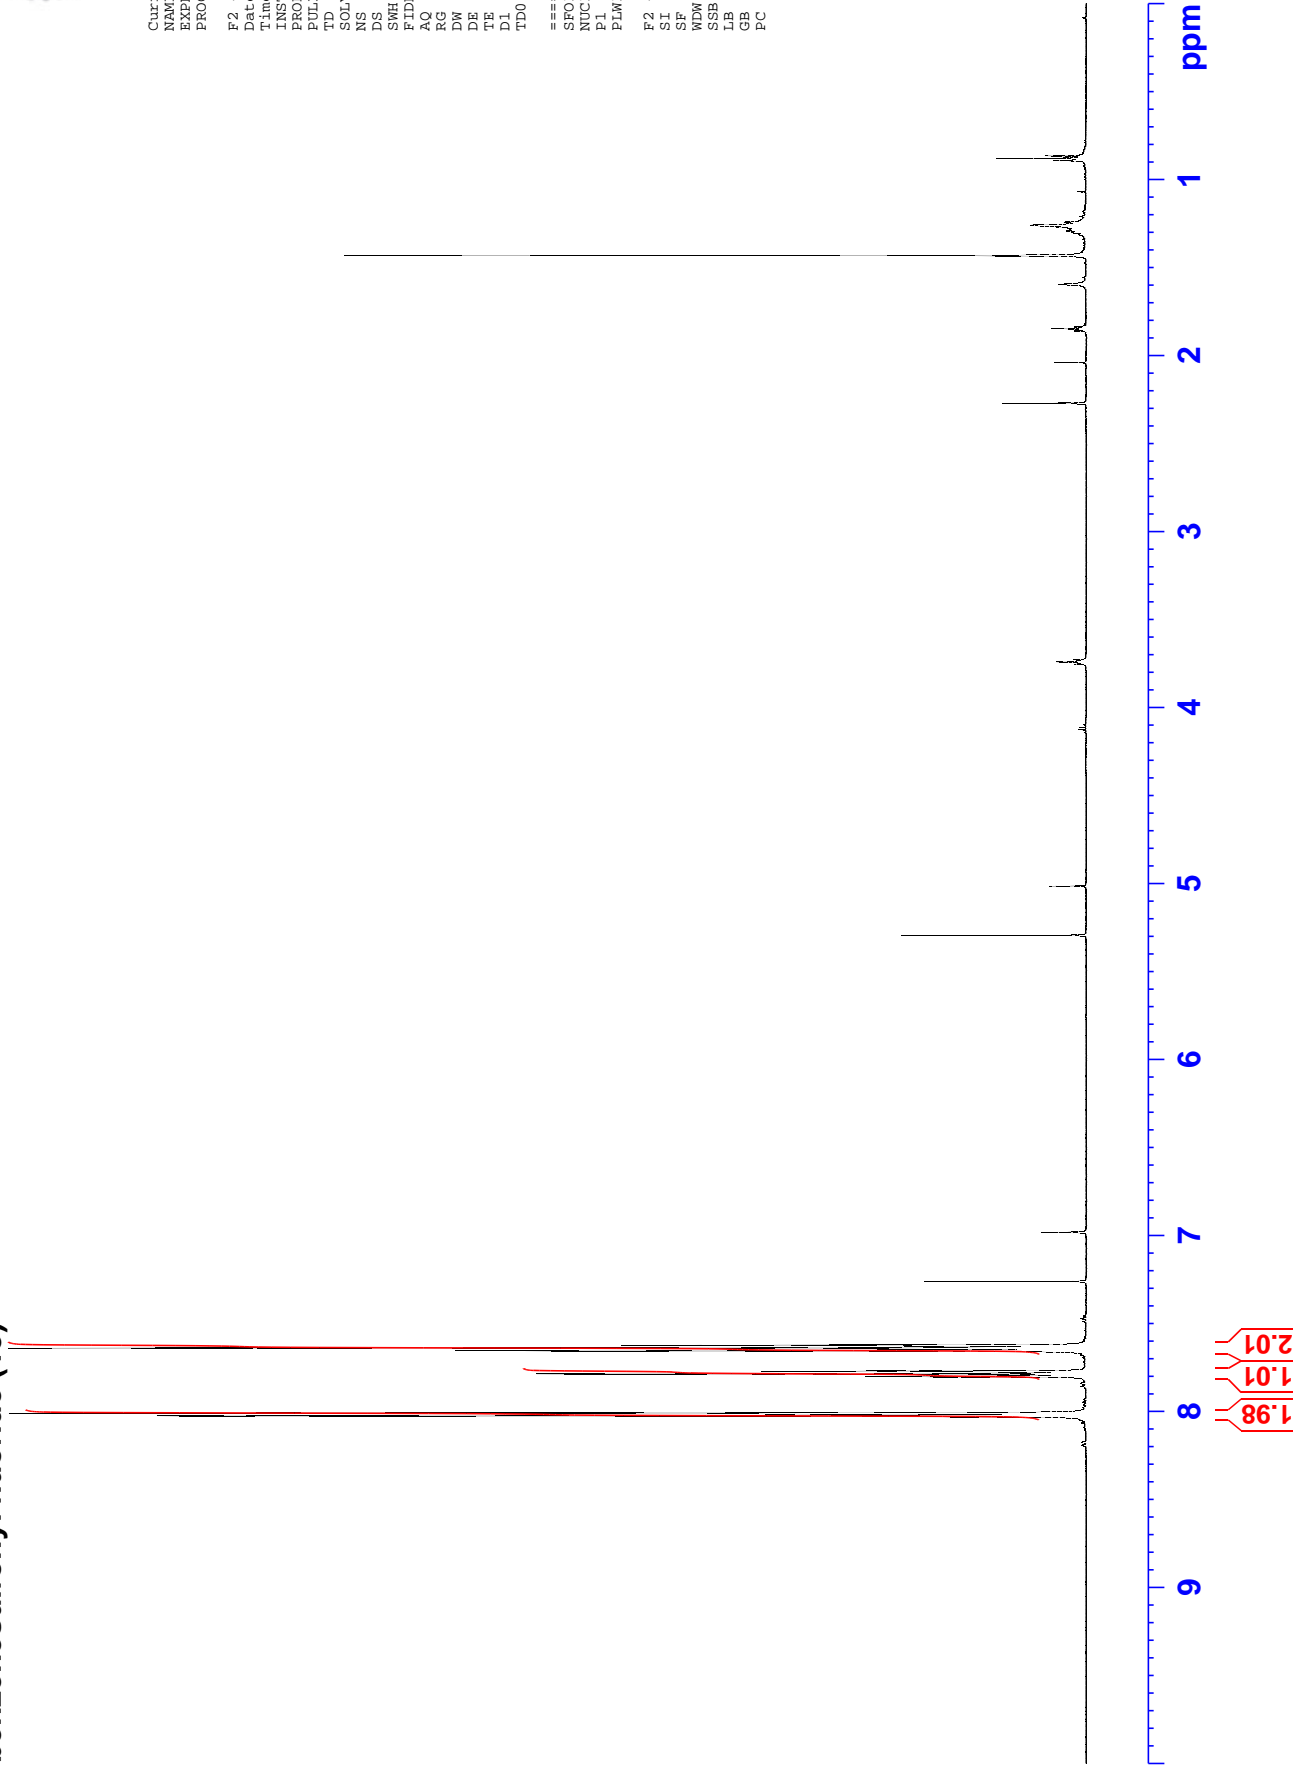

# benzenesulfonyl fluoride (13)

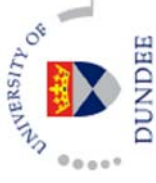

135.71  
133.34  
133.14  
129.80  
128.52

77.42  
77.16  
76.91

30.43

Current Data Parameters  
NAME  
EXNO 3  
PROCNO 1

F2 - Acquisition Parameters  
Date\_ 20170519  
Time 14.14  
INSTRUM spect  
PROBHD 5 mm QNP 1H/13  
PULPROG zgpg30  
TD 65536  
SOLVENT CDCl3  
NS 256  
DS 4  
SWH 29761.904 Hz  
FIDRES 0.454131 Hz  
AQ 1.1010048 sec  
RG 2050  
DW 16.800 usec  
DE 6.50 usec  
TE 298.2 K  
D1 2.0000000 sec  
D11 0.0300000 sec  
TD0 1

==== CHANNEL f1 =====  
SFO1 125.7703637 MHz  
NUC1 13C  
P1 7.50 usec  
PLW1 92.0000000 W

==== CHANNEL f2 =====  
SFO2 500.1320005 MHz  
NUC2 1H  
CPDPRG[2] waltz16  
PCPD2 80.00 usec  
PLW2 25.0000000 W  
PLW12 0.39063001 W  
PLW13 0.19648001 W

F2 - Processing parameters  
SI 32768  
SF 125.7577742 MHz  
WDW EM  
SSB 0  
LB 1.00 Hz  
GB 0  
PC 1.40

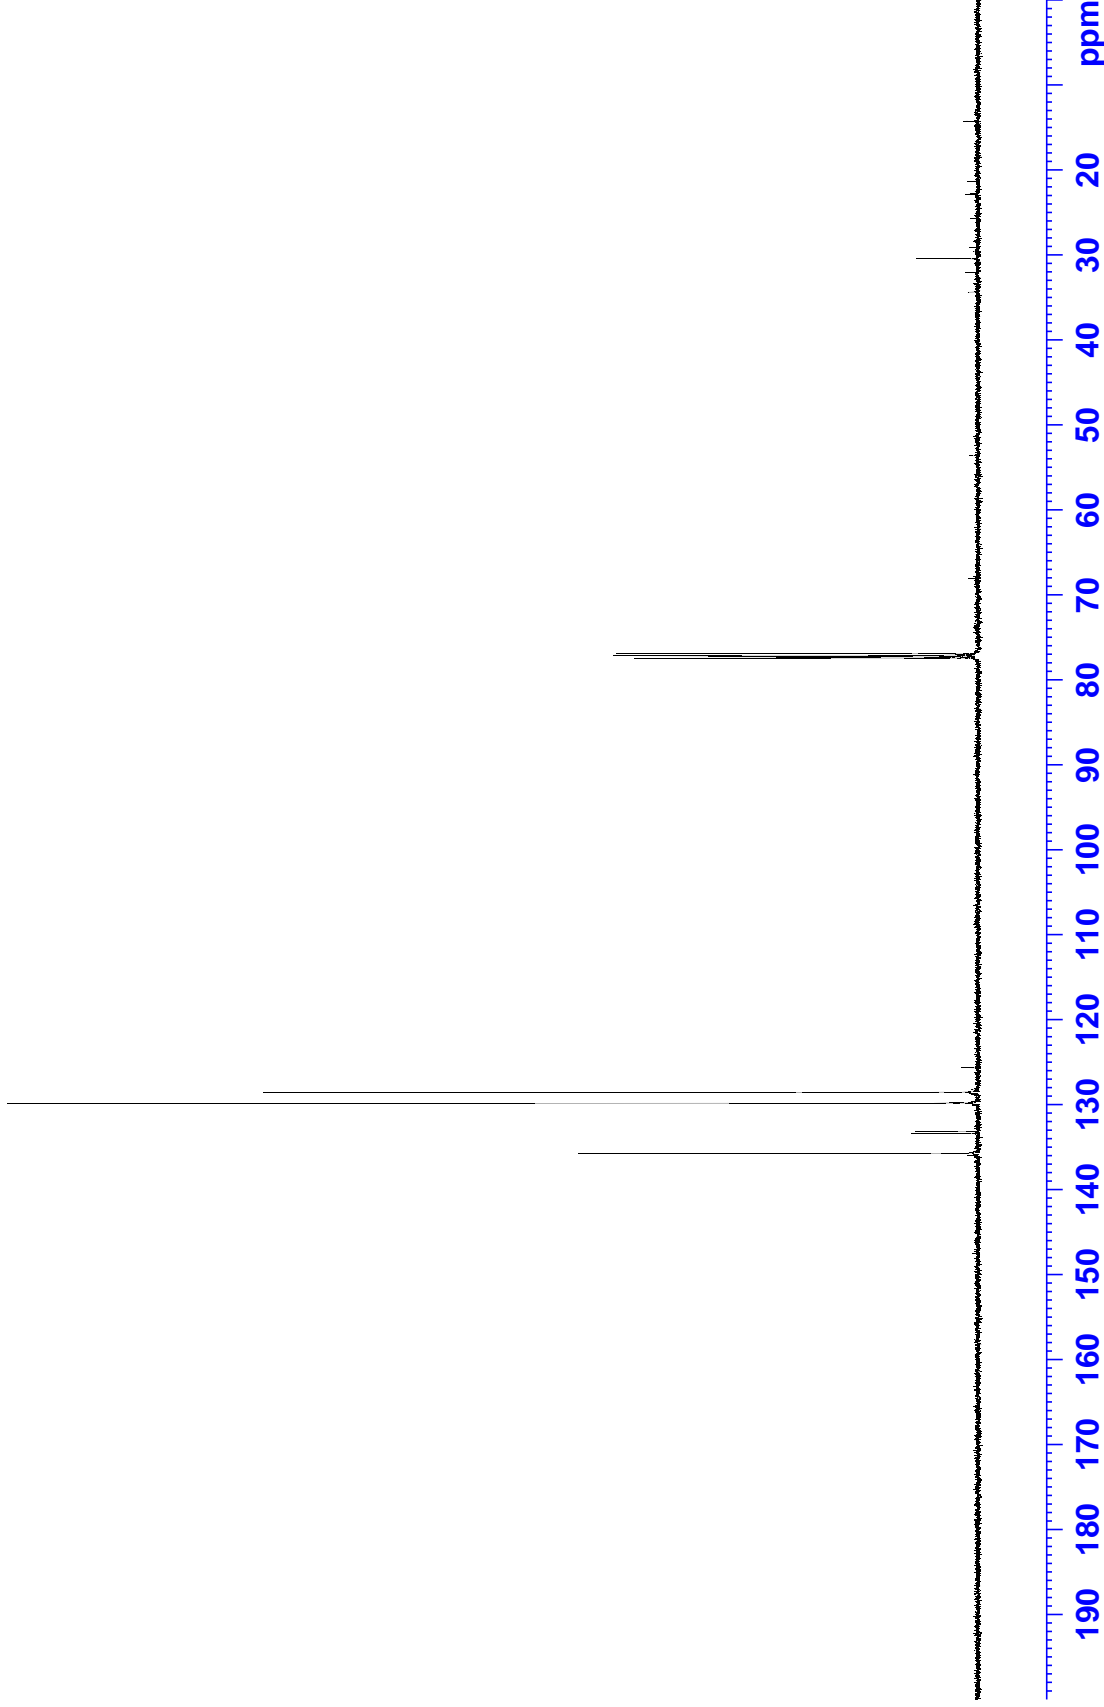

# methyl N-phenylcarbamate (14)



Current Data Parameters  
NAME 1  
EXPNO 1  
PROCNO 1  
F2 - Acquisition Parameters  
Date\_ 20170530  
Time 13.24  
INSTRUM spect  
PROBHD 5 mm PADUL 13C  
PULPROG zg30  
TD 131072  
SOLVENT CDCl3  
NS 16  
DS 4  
SWH 12019.230 Hz  
FIDRES 0.091699 Hz  
AQ 5.4525952 sec  
RG 10.29  
DW 41.600 usec  
DE 12.17 usec  
TE 298.2 K  
D1 0.1000000 sec  
TD0 1  
=====  
CHANNEL f1  
SFO1 400.1324710 MHz  
NUC1 1H  
P1 10.00 usec  
PLW1 20.0000000 W  
F2 - Processing parameters  
SI 131072  
SF 400.1300000 MHz  
WDW EM  
SSB 0  
LB 0.10 Hz  
GB 0  
PC 1.00

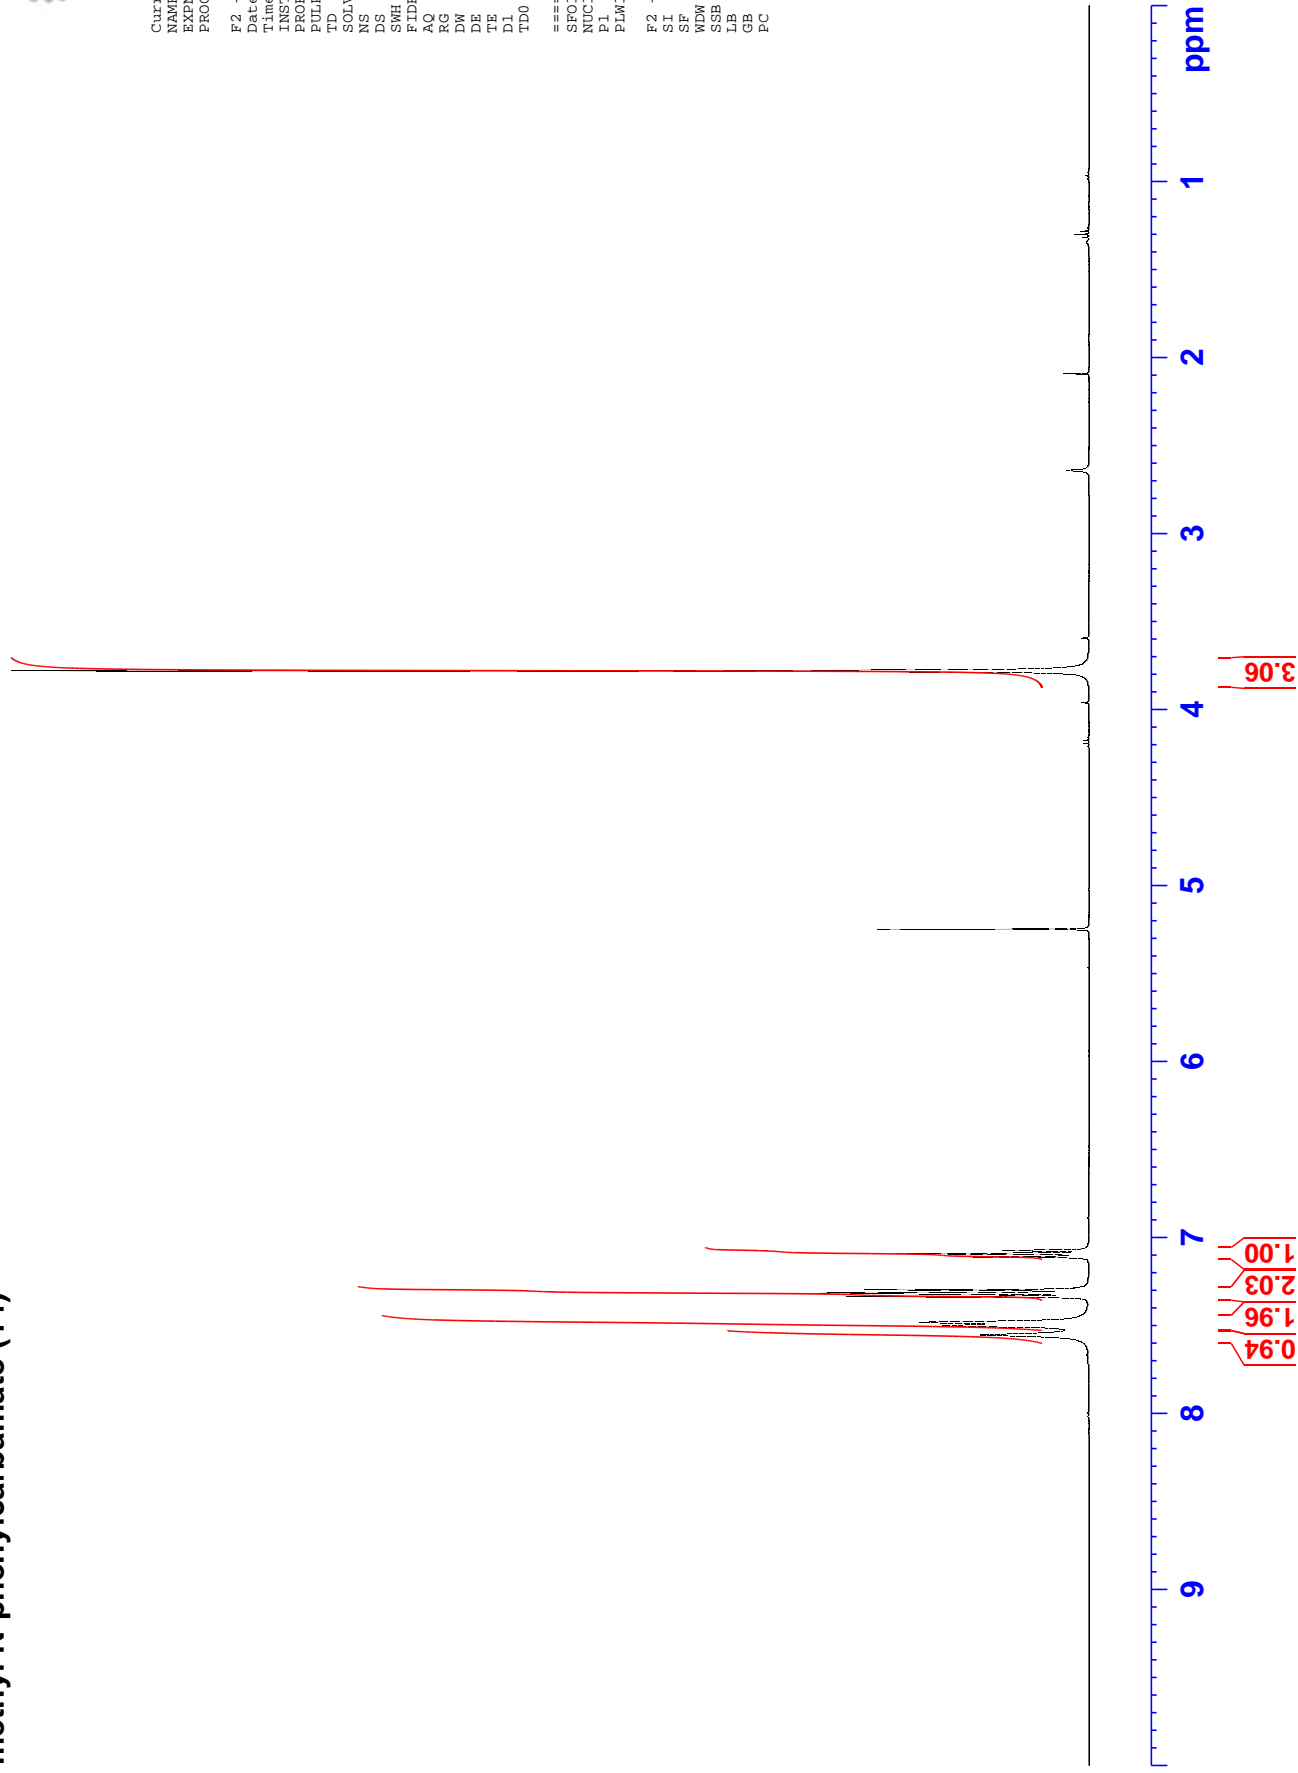

methyl N-phenylcarbamate (14)

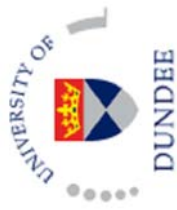

52.45

76.85  
77.16  
77.48

118.92

123.64

129.20

138.01

154.19

Current Data Parameters  
NAME EXPNO 11  
PROCNO 1

F2 - Acquisition Parameters  
Date\_ 20181112  
Time 19.42  
INSTRUM spect  
PROBHD 5 mm PADUL13C  
PULPROG udeflt  
TD 17996  
SOLVENT CDCl3  
NS 256  
DS 0  
SWH 25000.000 Hz  
FIDRES 1.389198 Hz  
AQ 0.3599200 sec  
RG 196.14  
DW 20.000 usec  
DE 8.66 usec  
TE 303.2 K  
D1 3.00000000 sec  
D11 0.03000000 sec  
D12 0.00002000 sec  
D20 200.00000000 sec  
TD0 1

==== CHANNEL f1 =====  
SF01 100.6238346 MHz  
NUC1 13C  
P1 10.00 usec  
P13 2000.00 usec  
P26 500.00 usec  
PLW1 36.00000000 W  
SPNAM[5] Crp60comp.4  
SFOALS 0.500  
SFOFFS5 0 Hz  
SEW5 5.50040007 W  
SFNAM[8] Crp60.0.5,20.1  
SFOALS8 0.500  
SFOFFS8 0 Hz  
SEW8 5.50040007 W

==== CHANNEL f2 =====  
SF02 400.1316005 MHz  
NUC2 1H  
CFDPRG[2] waltz64  
PCPD2 90.00 usec  
PLW2 20.00000000 W  
PLW12 0.24691001 W

F2 - Processing parameters  
SI 262144  
SF 100.6127538 MHz  
WDW EM  
SSB 0  
LB 2.00 Hz  
GB 0  
PC 1.40

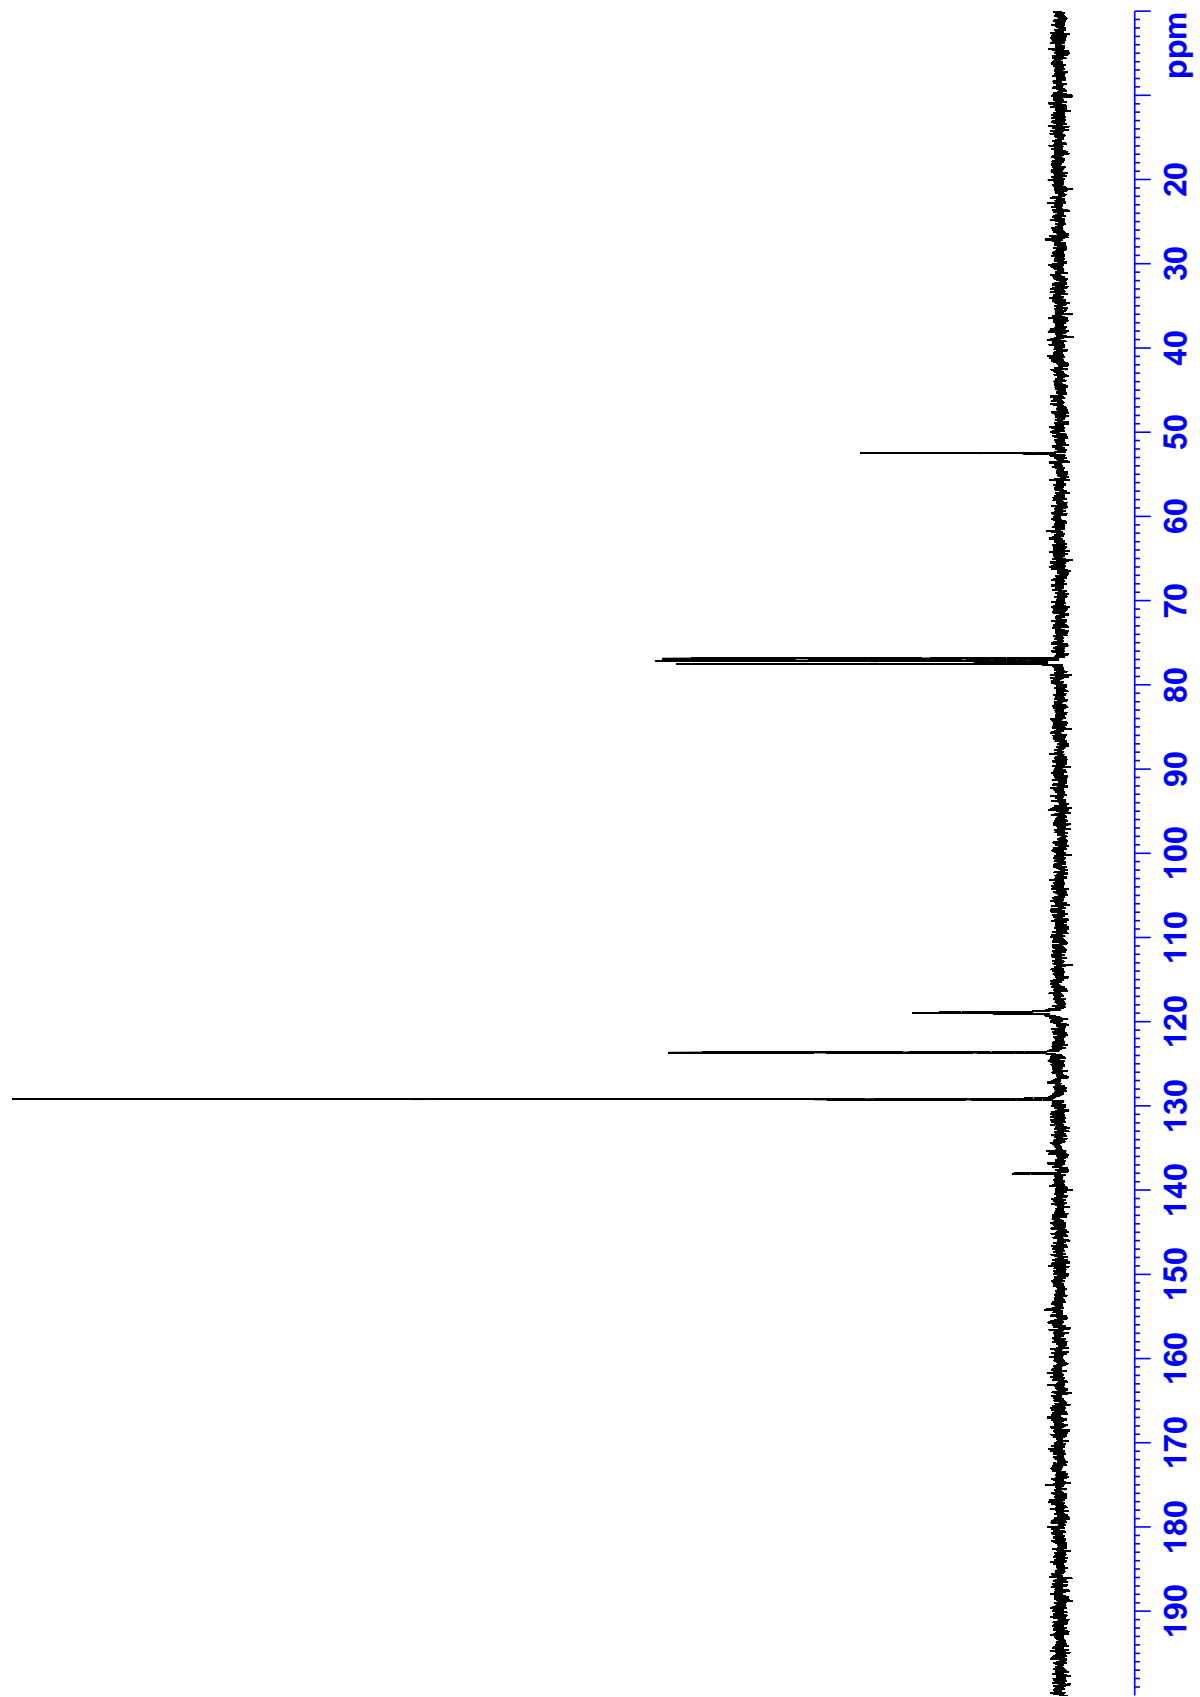

# N-phenylethanesulfonamide (15)



Current Data Parameters  
NAME 1  
EXPNO 1  
PROCNO 1  
F2 - Acquisition Parameters  
Date\_ 20170406  
Time 13.48  
INSTRUM spect  
PROBHD 5 mm QNP 1H/13  
PULPROG zg30  
TD 65536  
SOLVENT DMSO  
NS 16  
DS 2  
SWH 10000.000 Hz  
FIDRES 0.152588 Hz  
AQ 3.2767999 sec  
RG 161  
DW 50.000 usec  
DE 6.50 usec  
TE 298.2 K  
D1 1.0000000 sec  
TD0 1  
=====  
CHANNEL f1  
SFO1 500.1330885 MHz  
NUC1 1H  
P1 10.00 usec  
PLW1 25.0000000 W  
F2 - Processing parameters  
SI 65536  
SF 500.1300047 MHz  
WDW EM  
SSB 0  
LB 0.30 Hz  
GB 0  
PC 1.00

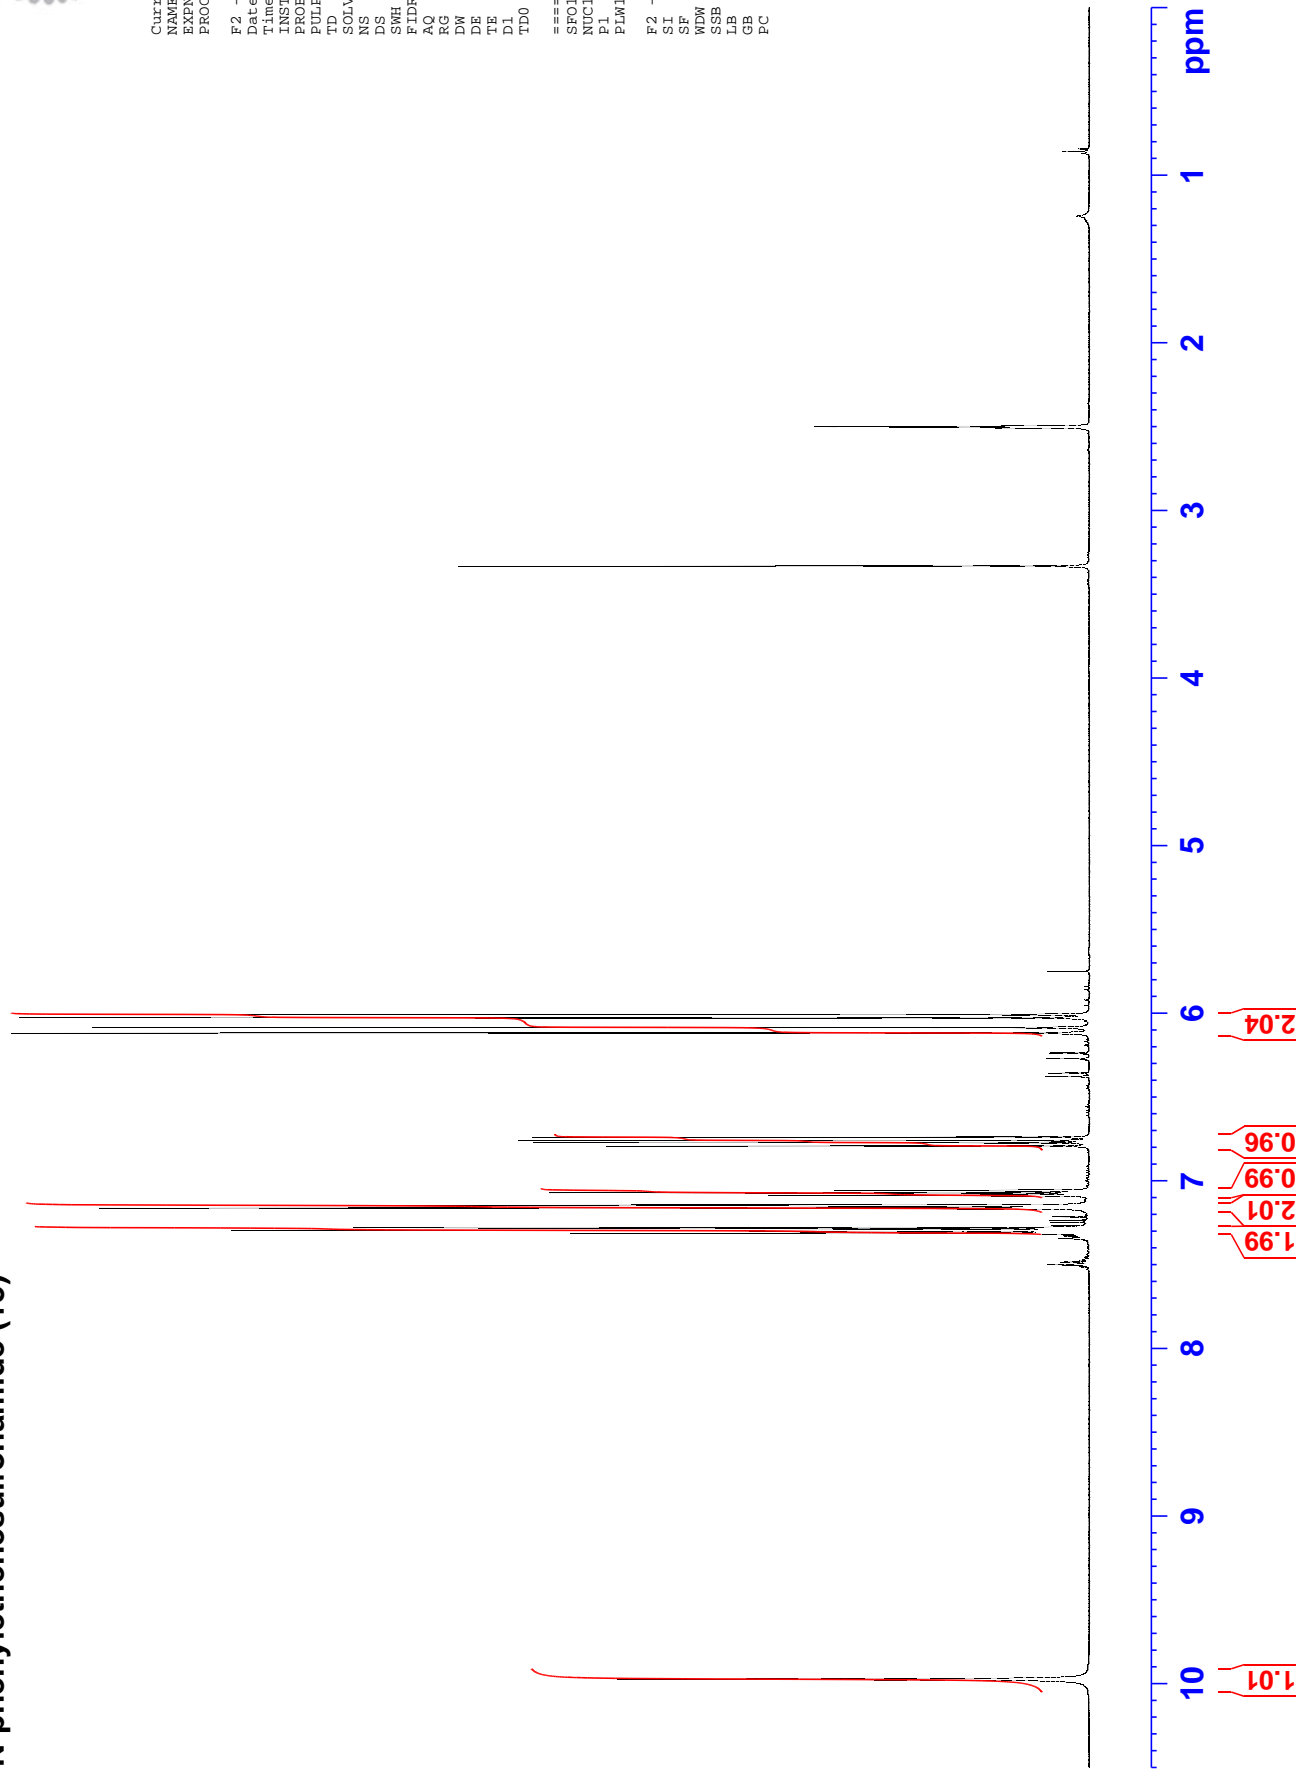



# N-phenylethanesulfonamide (15)



137.76  
136.25  
129.14  
127.55  
123.80  
119.70

40.02  
39.86  
39.69  
39.52  
39.35  
39.19  
39.02

Current Data Parameters  
NAME 2  
EXNO 1  
PROCNO 1

F2 - Acquisition Parameters  
Date\_ 20170406  
Time 14.06  
INSTRUM spect  
PROBHD 5 mm QNP 1H/13  
PULPROG zgpg30  
TD 65536  
SOLVENT DMSO  
NS 256  
DS 4  
SWH 29761.904 Hz  
FIDRES 0.454131 Hz  
AQ 1.1010048 sec  
RG 2050  
DM 16.800 usec  
DE 6.50 usec  
TE 298.2 K  
D1 2.0000000 sec  
D11 0.0300000 sec  
TD0 1

==== CHANNEL f1 =====  
SFO1 125.7703637 MHz  
NUC1 13C  
P1 7.50 usec  
PLW1 92.0000000 W

==== CHANNEL f2 =====  
SFO2 500.1320005 MHz  
NUC2 1H  
CPDPRG[2] waltz16  
PCPD2 80.00 usec  
PLW2 25.0000000 W  
PLW12 0.39063001 W  
PLW13 0.19648001 W

F2 - Processing parameters  
SI 32768  
SF 125.7578493 MHz  
WDW EM  
SSB 0  
LB 1.00 Hz  
GB 0  
PC 1.40

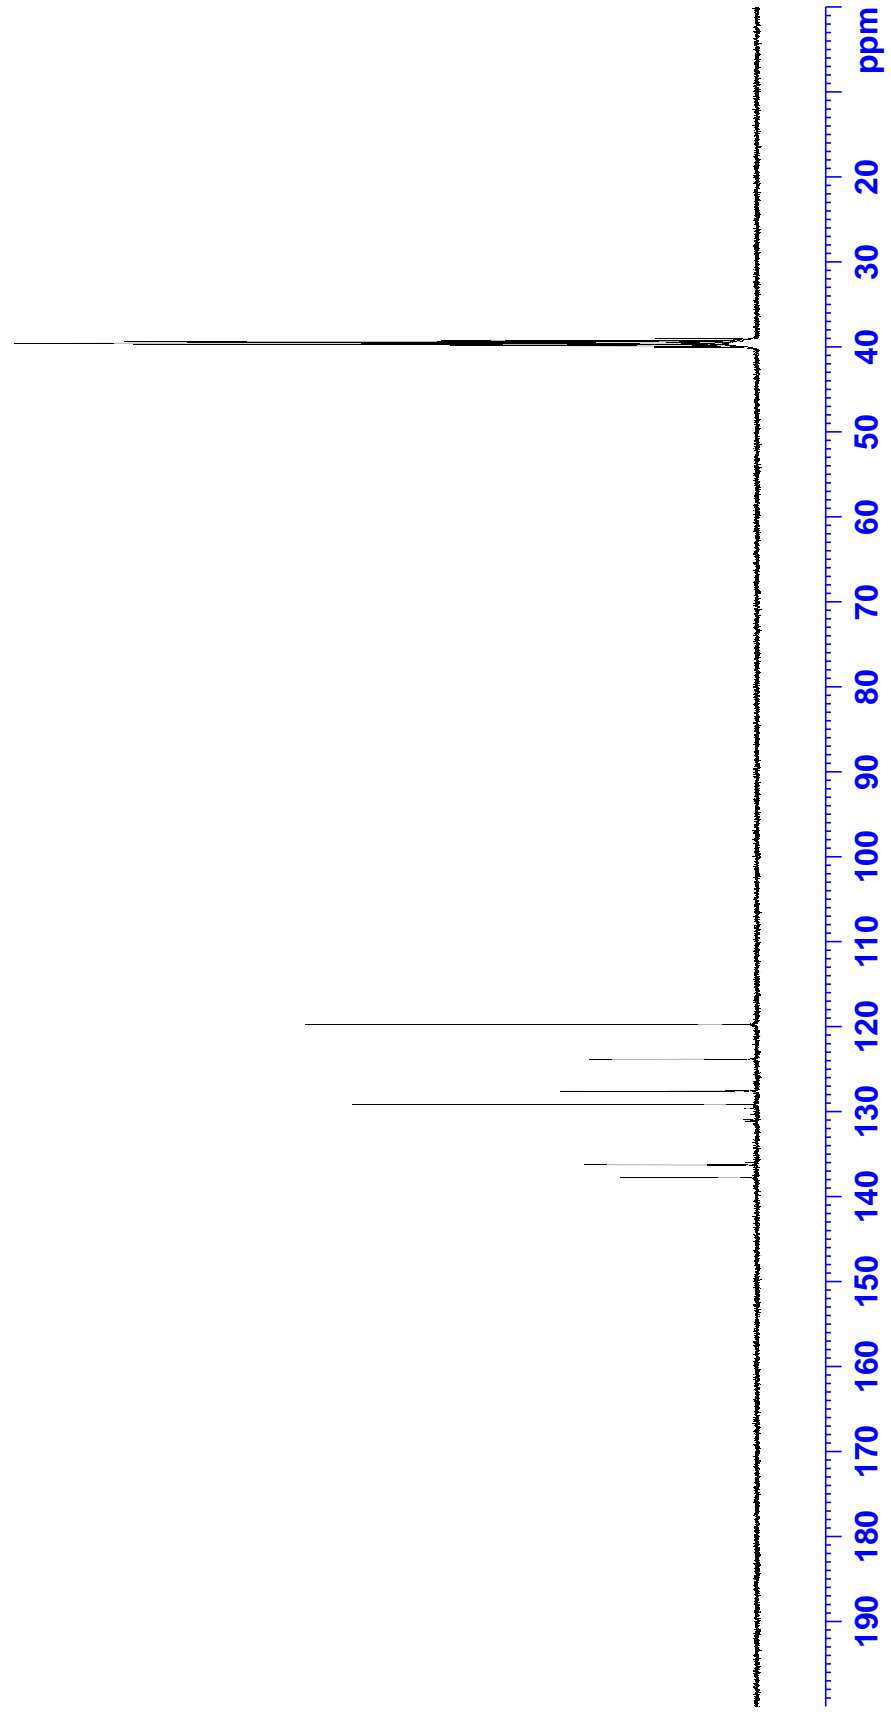

# 1-phenylprop-2-en-1-ol (18)



Current Data Parameters  
NAME 1  
EXPNO 1  
PROCNO 1

F2 - Acquisition Parameters  
Date\_ 20170524  
Time 16.41  
INSTRUM spect  
PROBHD 5 mm PADUL13C  
PULPROG zg30  
TD 131072  
SOLVENT CDCl3  
NS 16  
DS 4  
SWH 12019.230 Hz  
FIDRES 0.091699 Hz  
AQ 5.4525952 sec  
RG 10.29  
DW 41.600 usec  
DE 12.17 usec  
TE 298.2 K  
D1 0.1000000 sec  
TD0 1

==== CHANNEL f1 =====  
SFO1 400.1324710 MHz  
NUC1 1H  
P1 10.00 usec  
PLW1 20.0000000 W

F2 - Processing parameters  
SI 131072  
SF 400.1300091 MHz  
WDW EM  
SSB 0  
LB 0.10 Hz  
GB 0  
PC 1.00

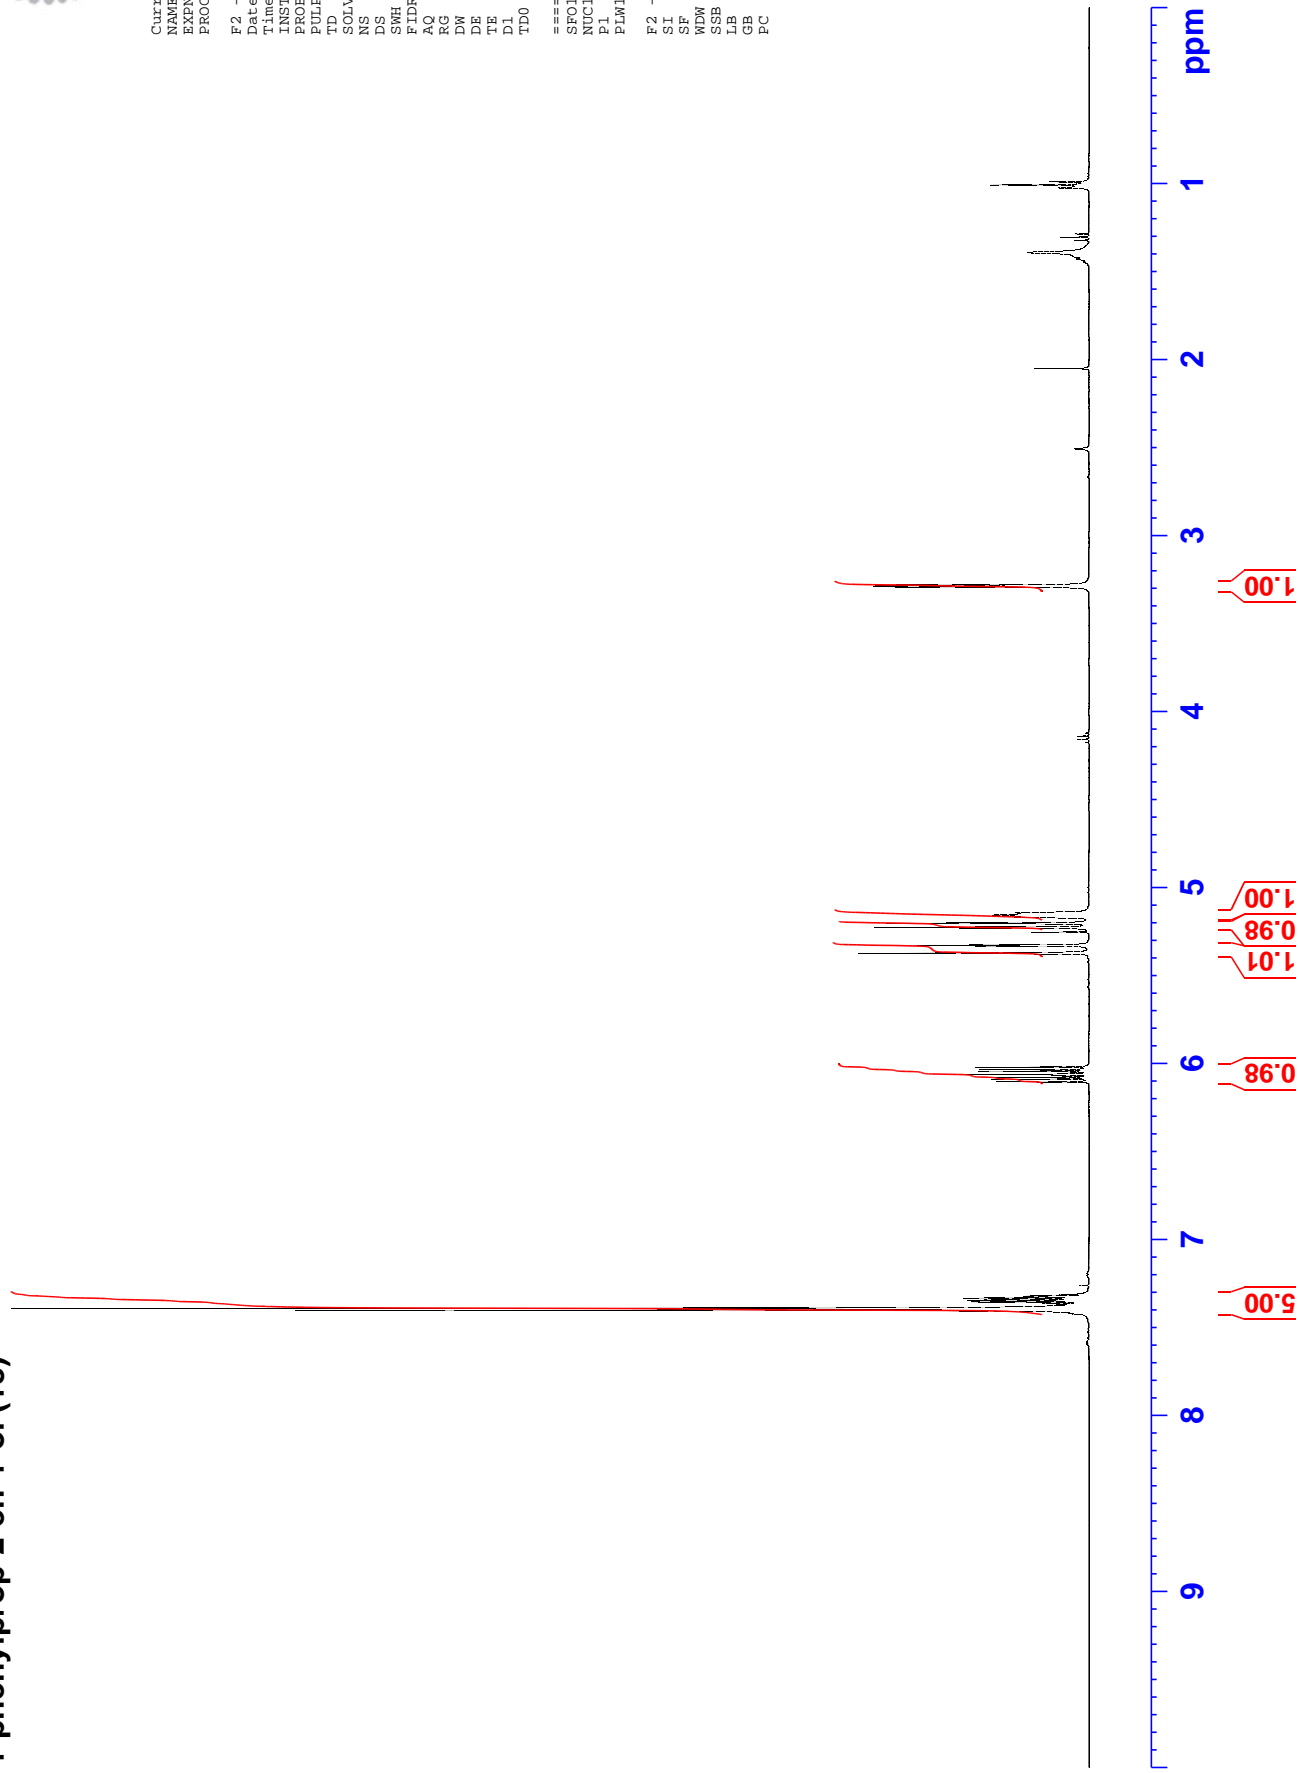

# 1-phenylprop-2-en-1-one (16)



Current Data Parameters  
NAME 1  
EXPNO 1  
PROCNO 1

F2 - Acquisition Parameters  
Date\_ 20170530  
Time 12.59  
INSTRUM spect  
PROBHD 5 mm PADUL 13C  
PULPROG zg30  
TD 131072  
SOLVENT CDCl3  
NS 16  
DS 4  
SWH 12019.230 Hz  
FIDRES 0.091699 Hz  
AQ 5.4525952 sec  
RG 31.23  
DW 41.600 usec  
DE 12.17 usec  
TE 298.2 K  
D1 0.1000000 sec  
TD0 1

==== CHANNEL f1 =====  
SFO1 400.1324710 MHz  
NUC1 1H  
P1 10.00 usec  
PLW1 20.0000000 W

F2 - Processing parameters  
SI 131072  
SF 400.1300094 MHz  
WDW EM  
SSB 0  
LB 0.10 Hz  
GB 0  
PC 1.00

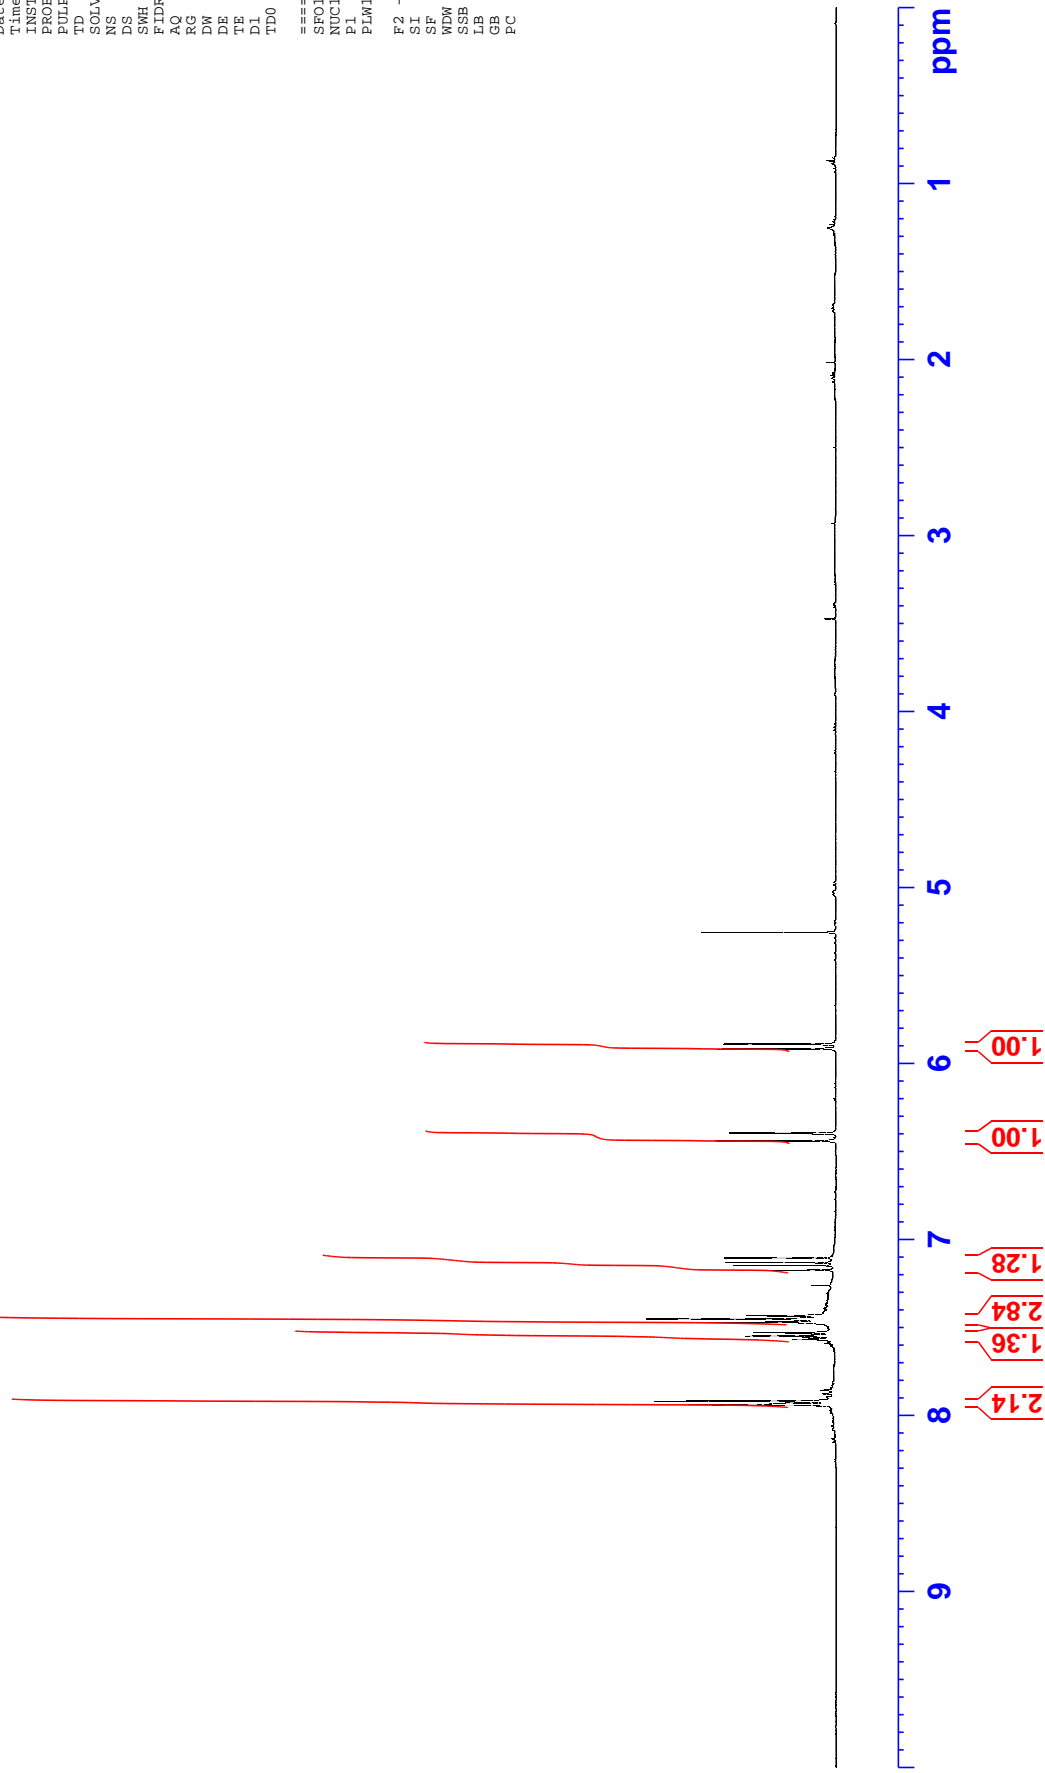

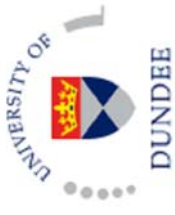

1-phenylprop-2-en-1-one

137.0  
133.3  
133.2  
130.0  
128.96  
128.88  
128.80  
128.72  
128.65  
128.51  
128.48  
128.41

77.48  
77.16  
76.84

```
Current Data Parameters
NAME          3
EXPNO        1
PROCNO       1

F2 - Acquisition Parameters
Date_        20170530
Time         15.15
INSTRUM      spect
PROBHD       5 mm PADUL13C
PULPROG      udeflt
TD           17996
SOLVENT      CDCl3
NS           256
DS           0
SWH          25000.000 Hz
FIDRES       1.389198 Hz
AQ           0.3599200 sec
RG           196.14
DE           20.000 usec
TE           298.2 K
D1           3.00000000 sec
D11          0.03000000 sec
D12          0.00002000 sec
D20         200.00000000 sec
TD0          1

===== CHANNEL f1 =====
SFO1        100.6238346 MHz
NUC1        13C
P1          10.00 usec
P13         2000.00 usec
P26         500.00 usec
PLW1        36.00000000 W
SPNAM[5]    Crp60comp.4
SFOALS      0.500
SFOFFS5     0 Hz
SEP5        5.50040007 W
SPNAM[8]    Crp60.0.5.20.1
SFOALS8     0.500
SFOFFS8     0 Hz
SPW8        5.50040007 W

===== CHANNEL f2 =====
SFO2        400.1316005 MHz
NUC2        1H
CFDPRG[2]   waltz64
PCPD2       90.00 usec
PLW2        20.00000000 W
PLW12       0.24691001 W

F2 - Processing parameters
SI          262144
SF          100.6127678 MHz
WDW         EM
SSB         0
LB          2.00 Hz
GB          0
PC          1.40
```

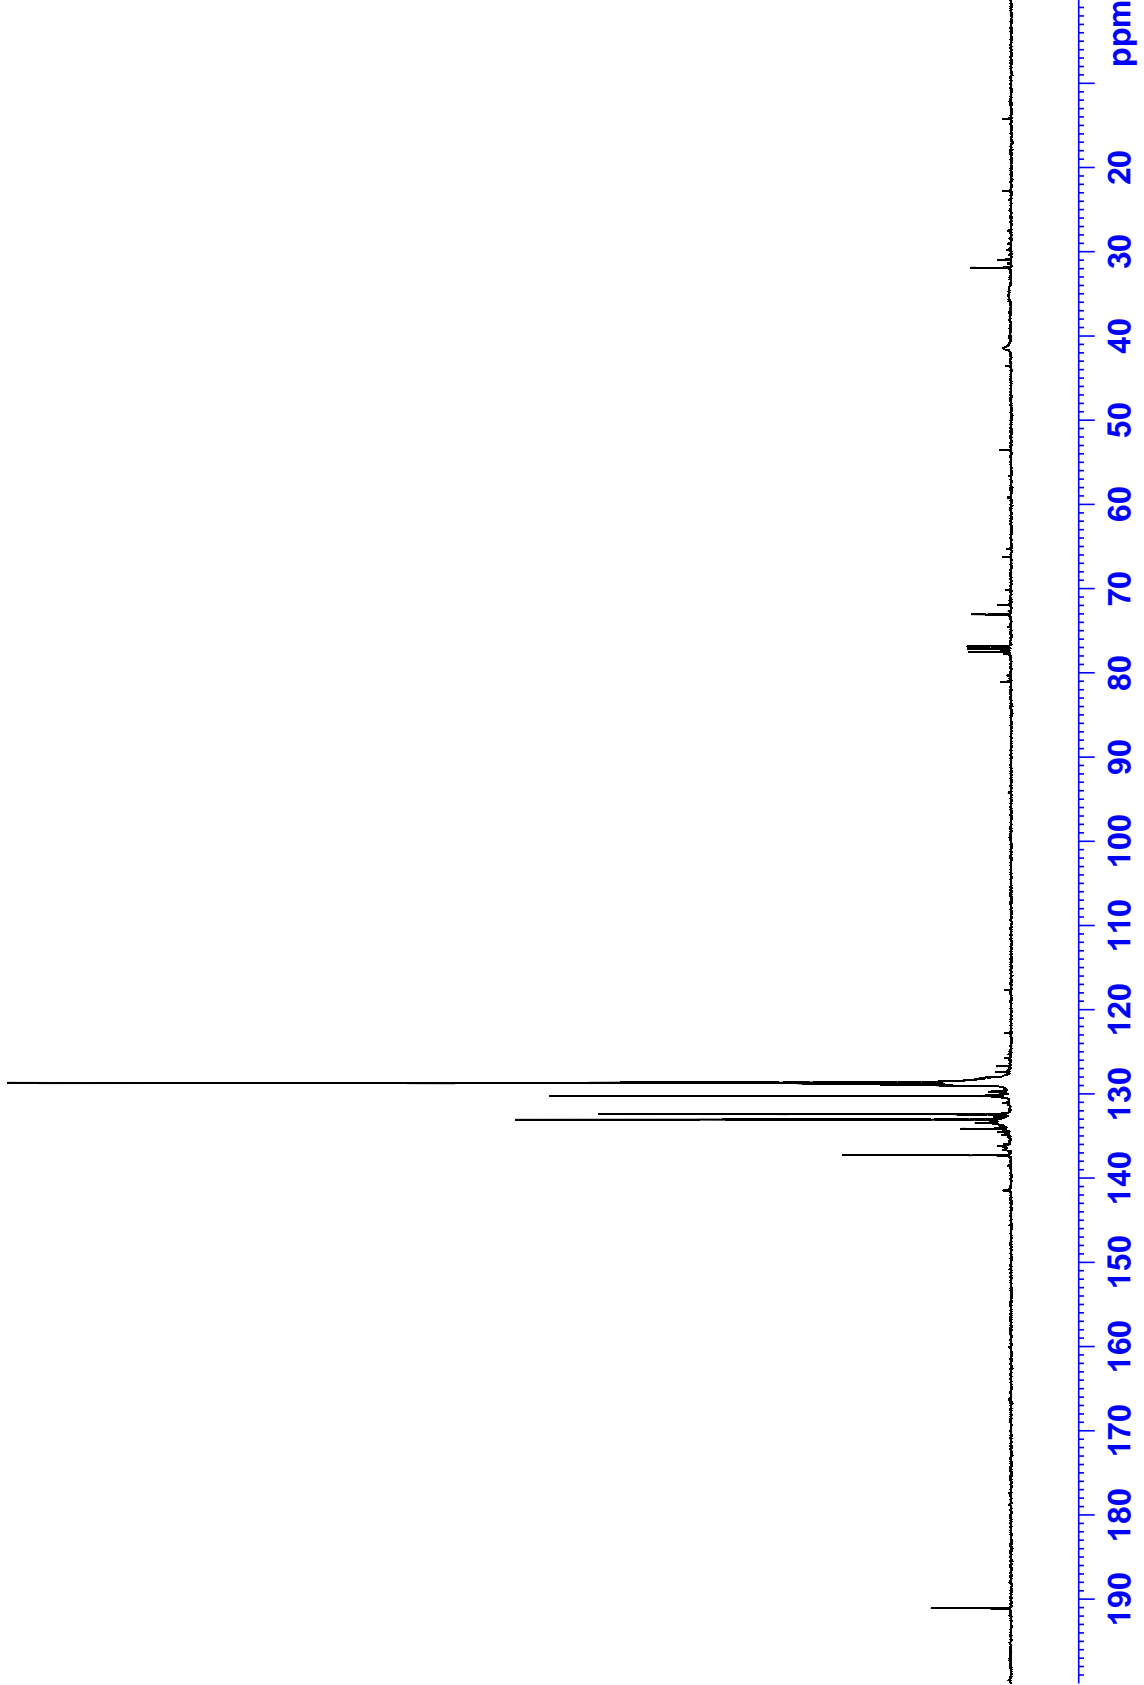

# Boc-Arg-OMe (19)



Current Data Parameters  
NAME 1  
EXPNO 1  
PROCNO 1

F2 - Acquisition Parameters  
Date\_ 20171103  
Time 11.35  
INSTRUM spect  
PROBHD 5 mm PADUL 13C  
PULPROG zg30  
TD 131072  
SOLVENT CDCl3  
NS 16  
DS 4  
SWH 12019.230 Hz  
FIDRES 0.091699 Hz  
AQ 5.4525952 sec  
RG 127.77  
DW 41.600 usec  
DE 12.17 usec  
TE 298.2 K  
D1 0.1000000 sec  
TD0 1

==== CHANNEL f1 =====  
SFO1 400.1324710 MHz  
NUC1 1H  
P1 10.00 usec  
PLW1 20.0000000 W

F2 - Processing parameters  
SI 131072  
SF 400.1300096 MHz  
WDW EM  
SSB 0  
LB 0.10 Hz  
GB 0  
PC 1.00

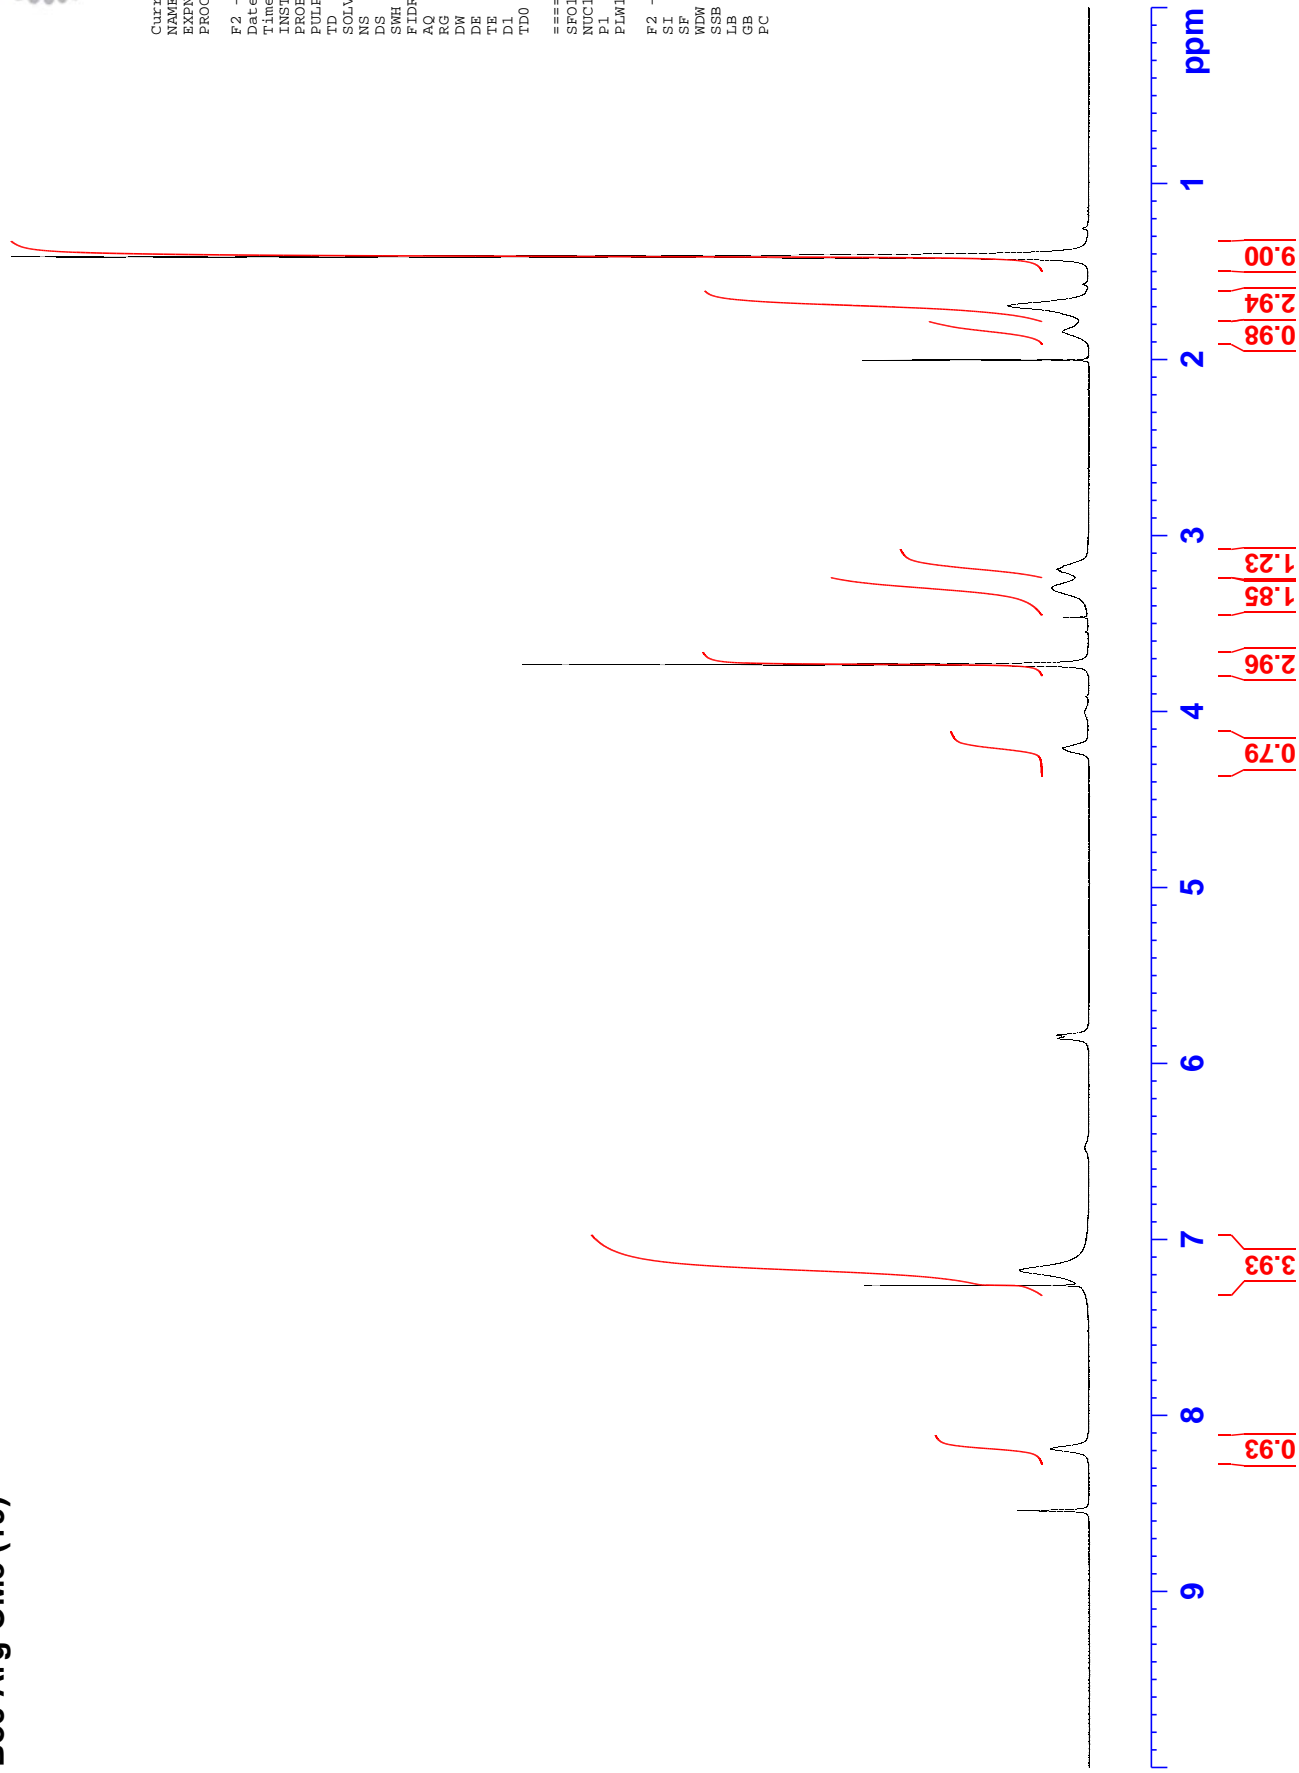

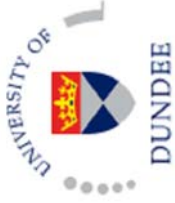

Current Data Parameters  
NAME  
EXPNO 3  
PROCNO 1

F2 - Acquisition Parameters  
Date\_ 20171103  
Time 12.07  
INSTRUM spect  
PROBHD 5 mm PADUL13C  
PULPROG udef1  
TD 17996  
SOLVENT CDC13  
NS 256  
DS 0  
SWH 25000.000 Hz  
FIDRES 1.389198 Hz  
AQ 0.3599200 sec  
RG 196.14  
DW 20.000 usec  
DE 8.66 usec  
TE 298.2 K  
D1 3.00000000 sec  
D11 0.03000000 sec  
D12 0.00002000 sec  
D20 200.00000000 sec  
TD0 1

==== CHANNEL f1 =====  
SFO1 100.6238346 MHz  
NUC1 13C  
P1 10.00 usec  
P13 2000.00 usec  
P26 500.00 usec  
PLM1 36.00000000 W  
SENAM[5] Crp60comp.4  
SPOAL5 0.500  
SPOFF5 0 Hz  
SPW5 5.50040007 W  
SPNAM[8] Crp60,0.5,20.1  
SPOAL8 0.500  
SPOFF8 0 Hz  
SPW8 5.50040007 W

==== CHANNEL f2 =====  
SFO2 400.1316005 MHz  
NUC2 1H  
waltz64  
PCPD2 90.00 usec  
PLM2 20.00000000 W  
PLW12 0.24691001 W

F2 - Processing parameters  
SI 262144  
SF 100.6127558 MHz  
WDW EM  
SSB 0  
LB 2.00 Hz  
GB 0  
PC 1.40

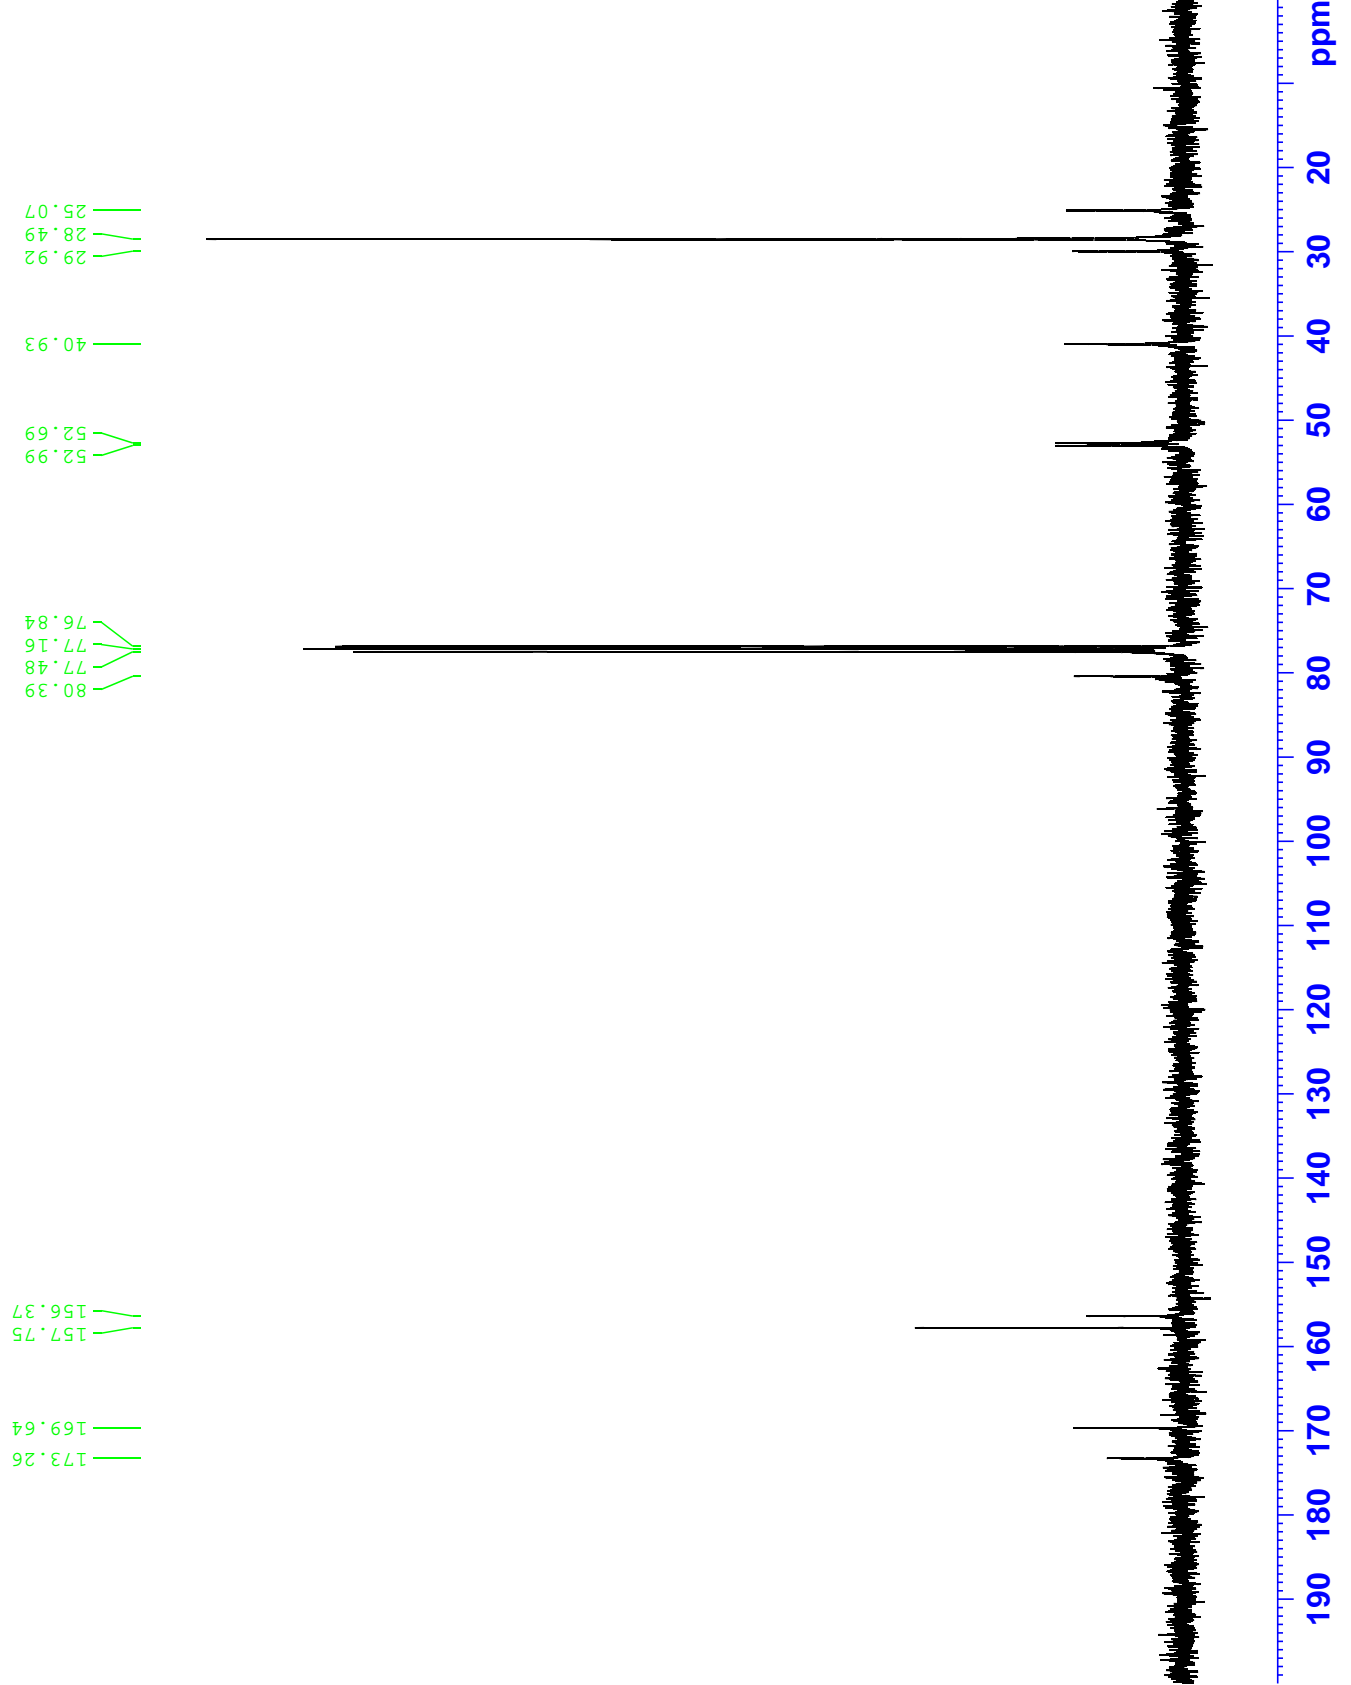

Supplement: mmc1.pdf [file mmc1.pdf]
